# Supplementary material
Source: PubMed Central journal article supplement (PMC5708124)

## Supplementary data

### **Identifying Hexahydroquinolines as New Antimalarial Candidates with Potent Blood Stage and Transmission-Blocking Activity**

Manu Vanaerschot<sup>1</sup>, Leonardo Lucantoni<sup>2</sup>, Tao Li<sup>3</sup>, Jill M. Combrinck<sup>4</sup>, Andrea Ruecker<sup>5,5</sup>, T.R. Santha Kumar<sup>1</sup>, Kelly Rubiano<sup>1</sup>, Pedro E. Ferreira<sup>6</sup>, Giulia Siciliano<sup>7</sup>, Sonia Gulati<sup>1</sup>, Philipp P. Henrich<sup>1</sup>, Caroline L. Ng<sup>1</sup>, James M. Murithi<sup>1</sup>, Victoria C. Corey<sup>8</sup>, Sandra Duffy<sup>2</sup>, Ori J. Lieberman<sup>1</sup>, M. Isabel Veiga<sup>6</sup>, Robert E. Sinden<sup>5</sup>, Pietro Alano<sup>7</sup>, Michael J. Delves<sup>5</sup>, Kim Lee Sim<sup>3</sup>, Elizabeth A. Winzeler<sup>8</sup>, Timothy J. Egan<sup>9</sup>, Stephen L. Hoffman<sup>3</sup>, Vicky M. Avery<sup>2</sup>, David A. Fidock<sup>1,10,\*</sup>

<sup>1</sup>Department of Microbiology and Immunology, Columbia University Medical Center, New York, NY, USA;

<sup>2</sup>Discovery Biology, Griffith Institute for Drug Discovery, Griffith University, Nathan, Queensland, Australia;

<sup>3</sup>Sanaria Inc., Rockville, MD, USA; <sup>4</sup>Division of Pharmacology, Department of Medicine, University of Cape

Town, Cape Town, South Africa; <sup>5</sup>Department of Life Sciences, Imperial College, London, UK; <sup>6</sup>Life and Health Sciences Research Institute (ICVS), School of Medicine, University of Minho, Braga, Portugal;

<sup>7</sup>Dipartimento di Malattie Infettive, Parassitarie ed Immunomediate, Istituto Superiore di Sanità, Rome,

Italy; <sup>8</sup>University of California, San Diego, School of Medicine, La Jolla, CA, USA; <sup>9</sup>Department of Chemistry,

University of Cape Town, Cape Town, South Africa; <sup>10</sup>Division of Infectious Diseases, Department of Medicine, Columbia University Medical Center, New York, NY, USA.

\*Corresponding author: df2260@cumc.columbia.edu

<sup>5</sup>Current address: Mahidol-Oxford Tropical Medicine Research Unit, Faculty of Tropical Medicine, Mahidol University, Bangkok 10400, Thailand; Centre for Tropical Medicine and Global Health, Nuffield Department of Medicine, University of Oxford, Oxford OX3 7FZ, UK

## Table of contents

|                                                                                                                                                                                                                         |           |
|-------------------------------------------------------------------------------------------------------------------------------------------------------------------------------------------------------------------------|-----------|
| <b>Supplementary Table 1.</b> Gametocytocidal activity of the 149 resourced selected screening hits.....                                                                                                                | <b>3</b>  |
| <b>Supplementary Table 2.</b> Activity of early- and late-stage GAM assay controls. ....                                                                                                                                | <b>6</b>  |
| <b>Supplementary Table 3.</b> Activity profile of the 4 compounds of interest identified by screening the GNF-Novartis Malaria Box. ....                                                                                | <b>7</b>  |
| <b>Supplementary Table 4a.</b> Transmission-blocking activity of HHQs. ....                                                                                                                                             | <b>8</b>  |
| <b>Supplementary Table 4b.</b> <i>In vivo</i> asexual blood stage activity of HHQs. ....                                                                                                                                | <b>8</b>  |
| <b>Supplementary Table 4c.</b> Detailed <i>in vivo</i> transmission-blocking data of all treatment groups.....                                                                                                          | <b>9</b>  |
| <b>Supplementary Table 5.</b> IC <sub>50</sub> data of the selected and genetically engineered (edited) lines against HHQs. ....                                                                                        | <b>10</b> |
| <b>Supplementary Table 6.</b> IC <sub>90</sub> data of the selected and genetically engineered (edited) lines against HHQs. ....                                                                                        | <b>11</b> |
| <b>Supplementary Table 7.</b> IC <sub>50</sub> data of early GAM stage NF54 and NF54-Y290F lines against HHQs.....                                                                                                      | <b>12</b> |
| <b>Supplementary Table 8.</b> Minimum estimated energy required for docking of HHQs to wild-type and mutated PfMDR1. ....                                                                                               | <b>13</b> |
| <b>Supplementary Table 9.</b> Interaction of GNF-Pf-5640 with wild-type and mutated PfMDR1. ....                                                                                                                        | <b>14</b> |
| <b>Supplementary Table 10.</b> Interaction of GNF-Pf-5660 with wild-type and mutated PfMDR1. ....                                                                                                                       | <b>15</b> |
| <b>Supplementary Table 11.</b> Interaction of GNF-Pf-5668 with wild-type and mutated PfMDR1. ....                                                                                                                       | <b>16</b> |
| <b>Supplementary Table 12.</b> Compound interaction table. ....                                                                                                                                                         | <b>17</b> |
| <b>Supplementary Table 13a.</b> IC <sub>50</sub> data for common and experimental antimalarials for the edited F1072L and S1075I lines and the selected Y290F and F1072L + CNV lines in the Dd2-B2 background.....      | <b>18</b> |
| <b>Supplementary Table 13b.</b> IC <sub>50</sub> data for the NF54 and selected NF54 Y290F lines.....                                                                                                                   | <b>18</b> |
| <b>Supplementary Table 13c.</b> IC <sub>50</sub> data for the FCB and KD1 lines.....                                                                                                                                    | <b>18</b> |
| <b>Supplementary Table 14a.</b> IC <sub>90</sub> data for common and experimental antimalarials for the edited F1072L and S1075I lines and the selected Y290F and F1072L + CNV lines in the Dd2-B2 background.....      | <b>19</b> |
| <b>Supplementary Table 14b.</b> IC <sub>90</sub> data for the NF54 and selected NF54 Y290F lines.....                                                                                                                   | <b>19</b> |
| <b>Supplementary Table 14c.</b> IC <sub>90</sub> data for the FCB and KD1 lines.....                                                                                                                                    | <b>19</b> |
| <b>Supplementary Table 15.</b> Heme fractionation data. ....                                                                                                                                                            | <b>20</b> |
| <b>Supplementary Table 16.</b> Western Blot data. ....                                                                                                                                                                  | <b>21</b> |
| <b>Supplementary Table 17.</b> Parasite lines generated in this study. ....                                                                                                                                             | <b>22</b> |
| <b>Supplementary Figure 1.</b> Inhibitory activity distribution in the two primary screening campaigns and availability of samples for dose-response confirmation testing in relationship to hit activity profile. .... | <b>23</b> |
| <b>Supplementary Figure 2.</b> Gametocytocidal, asexual and cytotoxic dose-responses of the selected compounds. ....                                                                                                    | <b>24</b> |
| <b>Supplementary Figure 3.</b> Structure of GNF-Pf-5310.....                                                                                                                                                            | <b>25</b> |
| <b>Supplementary Figure 4.</b> Moieties of HHQs that interact with mutant PfMDR1. ....                                                                                                                                  | <b>26</b> |
| <b>Supplementary Figure 5a.</b> Western Blots experiments 1–3.....                                                                                                                                                      | <b>27</b> |
| <b>Supplementary Figure 5b.</b> Western Blots experiments 4–6. ....                                                                                                                                                     | <b>28</b> |

**Supplementary Table 1.** Gametocytocidal activity of the 149 resourced selected screening hits.

| Compound | Commercial source                 | SMILES                                                                     | Luciferase early          |                             | Imaging late GAM      |                            |
|----------|-----------------------------------|----------------------------------------------------------------------------|---------------------------|-----------------------------|-----------------------|----------------------------|
|          |                                   |                                                                            | GAM IC <sub>50</sub> (nM) | Early GAM pIC <sub>50</sub> | IC <sub>50</sub> (nM) | Late GAM pIC <sub>50</sub> |
| 1        | GNF-Pf-1319                       | CCc4ccc3NC(=O)C1(NN=C(S1)c2ccc(C)cc2)c3c4                                  | > 5000                    | <5.40                       | 955.0                 | 6.0                        |
| 2        | GNF-Pf-4550                       | CCOC(=O)C2Nc1ccc(C)cc1C=2/N=N/C(C                                          | > 5000                    | <5.40                       | > 5000                | <5.40                      |
| 3        | GNF-Pf-5036                       | C/C(=N)NC(=O)c1ccc(C)cc1)/c2cccn2                                          | > 5000                    | <5.40                       | 461.0                 | 6.3                        |
| 4        | GNF-Pf-771                        | CN4C(=O)C(CI)=C1c3c(C(=O)c2ccccc12)c(CI)ccc34                              | 5.6                       | 8.3                         | 4.7                   | 8.3                        |
| 5        | GNF-Pf-5134                       | CCN2c1cccc1N(C)C2(C)c3ccccc3                                               | > 5000                    | <5.40                       | 1542.0                | 5.8                        |
| 6        | MMV666596, GNF-Pf-366             | CSC3=N/C(=N\c1c(C)cccc1C)/C2(CCC(C2)C(C)(C)N3c4ccc(CI)cc4                  | > 5000                    | <5.40                       | > 5000                | <5.40                      |
| 7        | GNF-Pf-5542                       | [O-][N+](=O)C1=CC=C(O1)C(=O)Nc3ccc2OC(=Nc2c3)c4ccccc4F                     | > 5000                    | <5.40                       | 802.0                 | 6.1                        |
| 8        | GNF-Pf-1329                       | Cc1ccc(cc1Br)C3=Nc2cc(ccc2O3)NC(=O)C4=CC=C(O4)[N+][O-]=O                   | > 5000                    | <5.40                       | 971.0                 | 6.0                        |
| 9        | GNF-Pf-2740                       | [O-][N+](=O)C1=CC=C(O1)C(=O)Nc3ccc2OC(=Nc2c3)c5ccccc4ccccc45               | 4362.7                    | 5.4                         | 1830.0                | 5.7                        |
| 10       | GNF-Pf-783, TCMD-123925           | Cc1cccc(c1)C3=Nc2cc(ccc2O3)NC(=O)C4=CC=C(O4)[N+][O-]=O                     | > 5000                    | <5.40                       | 352.0                 | 6.5                        |
| 11       | GNF-Pf-4107, SJ000011260          | Cc1cccc(c1)C(=O)NCC2=NNC(=S)N2c3ccc(cc3)C(F)F                              | > 5000                    | <5.40                       | > 5000                | <5.40                      |
| 12       | GNF-Pf-4479                       | CC3NC1CC(CC(=O)C)=1C(c2ccc(CI)cc2)C=3C(=O)OC4CCCC4)c5ccc(CI)cc5            | 287.2                     | 6.5                         | 1311.0                | 5.9                        |
| 13       | GNF-Pf-5592                       | CCCC(=O)C2=C(C)NC1CC(CC(=O)C)=1C2c3cccc(CI)c3Cl)c4ccc(cc4)OC               | 499.5                     | 6.3                         | 991.0                 | 6.0                        |
| 14       | GNF-Pf-5274                       | COc1ccc(cc1)C2CC(=O)C4=C(C2)NC(C)=C(C(=O)OC3CCCC3)C4c5ccc(CI)cc5           | 3727.0                    | 5.4                         | > 5000                | <5.40                      |
| 15       | GNF-Pf-5575                       | COc1ccc(cc1)C2CC(=O)C4=C(C2)NC(C)=C(C(=O)OC3CCCC3)C4c5ccc(CI)cc5Cl         | 359.2                     | 6.4                         | 1175.8                | 5.9                        |
| 16       | GNF-Pf-5138                       | Cc1cc(C)c3c(c1)C2C(=S)SSC=2C(C)(N)3C(=O)COC5=Nc4ccccc4S5                   | > 5000                    | <5.40                       | 1265.0                | 5.9                        |
| 17       | GNF-Pf-5547                       | COc1ccc(cc1)C2CC(=O)C4=C(C2)NC(C)=C(C(=O)OC3CCCC3)C4c5ccc(F)cc5            | > 5000                    | <5.40                       | > 5000                | <5.40                      |
| 18       | GNF-Pf-5209                       | COc5cc4c(nc2c(Cc1cccc1)=NN2c3ccccc3)c4cc5OC)c6cc(Br)ccc6O                  | 242.6                     | 6.6                         | 791.2                 | 6.1                        |
| 19       | GNF-Pf-5505                       | COc1ccc(cc1OC)C2CC(=O)C3=C(C2)NC(C)=C(C(=O)OC(C)C)C3c4cccc(F)cc4           | 225.7                     | 6.6                         | > 5000                | <5.40                      |
| 20       | <b>GNF-Pf-5640</b>                | <b>COc1ccc(cc1OC)C2CC(=O)C3=C(C2)NC(C)=C(C(=O)OC(C)C)C3c4ccccc4C</b>       | <b>15.1</b>               | <b>7.8</b>                  | <b>92.1</b>           | <b>7.0</b>                 |
| 21       | GNF-Pf-5651                       | CCOC(=O)C2=C(C)NC1CC(CC(=O)C)=1C2c3ccc(F)cc3)c4ccc(OC)c(c4)OC              | 56.0                      | 7.3                         | 970.0                 | 6.0                        |
| 22       | GNF-Pf-4851                       | COc1ccc(cc1OC)C2CC(=O)C3=C(C2)NC(C)=C(C(=O)OC(C)C)C3c4cccc(Br)c4           | > 5000                    | <5.40                       | > 5000                | <5.40                      |
| 23       | GNF-Pf-5674                       | COc1ccc(cc1OC)C2CC(=O)C3=C(C2)NC(C)=C(C(=O)OC(C)C)C3c4cccc(CI)cc4Cl        | > 5000                    | <5.40                       | > 5000                | <5.40                      |
| 24       | GNF-Pf-5501                       | COCCOC(=O)C2=C(C)NC1CC(CC(=O)C)=1C2c3cccc(CI)c3Cl)c4ccc(OC)c(c4)OC         | 1532.9                    | 5.8                         | > 5000                | <5.40                      |
| 25       | GNF-Pf-5446                       | COc1ccc(cc1OC)C2CC(=O)C4=C(C2)NC(C)=C(C(=O)OC3CCCC3)C4c5ccccc5OC           | > 5000                    | <5.40                       | > 5000                | <5.40                      |
| 26       | GNF-Pf-5436                       | COc1ccc(cc1OC)C2CC(=O)C4=C(C2)NC(C)=C(C(=O)OC3CCCC3)C4c5ccc(CI)cc5         | 383.7                     | 6.4                         | > 5000                | <5.40                      |
| 27       | GNF-Pf-5621                       | COc1ccc(cc1OC)C2CC(=O)C3=C(C2)NC(C)=C(C(=O)OC(C)C)C3c4cccc(CI)c4Cl         | 215.3                     | 6.7                         | 893.0                 | 6.0                        |
| 28       | GNF-Pf-4529                       | COc1ccc(cc1OC)C2CC(=O)C3=C(C2)NC(C)=C(C(=O)OC(C)C)C3c4cccc4F               | 540.1                     | 6.3                         | > 5000                | <5.40                      |
| 29       | GNF-Pf-5672                       | CCCC(=O)C2=C(C)NC1CC(CC(=O)C)=1C2c3ccc(CI)cc3Cl)c4ccc(OC)c(c4)OC           | 185.6                     | 6.7                         | > 5000                | <5.40                      |
| 30       | GNF-Pf-5560                       | COCCOC(=O)C2=C(C)NC1CC(CC(=O)C)=1C2c3ccc(F)cc3)c4ccc(OC)c(c4)OC            | 226.8                     | 6.6                         | > 5000                | <5.40                      |
| 31       | GNF-Pf-5572                       | COc1ccc(cc1OC)C2CC(=O)C3=C(C2)NC(C)=C(C(=O)OC(C)C)C3c4cccc(C)c4            | 857.2                     | 6.1                         | > 5000                | <5.40                      |
| 32       | GNF-Pf-5655                       | CCOC(=O)C2=C(C)NC1CC(CC(=O)C)=1C2c3ccc(CI)cc3Cl)c4ccc(OC)c(c4)OC           | 74.2                      | 7.1                         | > 5000                | <5.40                      |
| 33       | <b>GNF-Pf-5660</b>                | <b>CCOC(=O)C2=C(C)NC1CC(CC(=O)C)=1C2c3ccccc3Cl)c4ccc(OC)c(c4)OC</b>        | <b>14.4</b>               | <b>7.8</b>                  | <b>132.0</b>          | <b>6.8</b>                 |
| 34       | GNF-Pf-5670                       | CCOC(=O)C2=C(C)NC1CC(CC(=O)C)=1C2c3ccc(Br)cc3)c4ccc(OC)c(c4)OC             | 645.2                     | 6.2                         | > 5000                | <5.40                      |
| 35       | GNF-Pf-4922, GNF-Pf-4026          | COc(=O)c1cccc(cc1)C4C2C(=O)CC(CC=2Nc3ccccc3N4C(=O)C5=CC=CS5)c6ccc(C)cc6    | > 5000                    | <5.40                       | > 5000                | <5.40                      |
| 36       | GNF-Pf-2090                       | COc1ccc(cc1)c3cnnc(N/N=C/C2=CC=C(O2)[N+][O-])=O)n3                         | 1482.3                    | 5.8                         | 567.0                 | 6.2                        |
| 37       | GNF-Pf-812                        | COc1ccc(cc1)C6Nc5ccc(Cc3ccc2NC(=Nc2c3)c4ccc(cc4)OC)cc5N=6                  | 666.5                     | 6.2                         | > 5000                | <5.40                      |
| 38       | GNF-Pf-4252                       | COc5cc4c(nc1c(C(=NN1c2ccccc2)c3ccccc3)c4cc5OC)c6cc(Br)ccc6O                | 120.5                     | 6.9                         | 489.0                 | 6.3                        |
| 39       | GNF-Pf-5240                       | CCOC1ccc(cc1)C4C3Nc2ccccc2C=3CCN4C(=O)C6=Cc5cc(Br)ccc5O6                   | 137.8                     | 6.9                         | 899.0                 | 6.0                        |
| 40       | GNF-Pf-4667                       | COC(=O)c1cccc(cc1)C4C2C(=O)CC(CC=2Nc3ccccc3N4C(=O)C5=CC=CS5)c6ccc(cc6)OC   | > 5000                    | <5.40                       | > 5000                | <5.40                      |
| 41       | GNF-Pf-1209                       | CC3C/C(=C\c1ccncc1)/C(=O)/C(=C/c2cncc2)/C3                                 | 464.8                     | 6.3                         | 43.2                  | 7.4                        |
| 42       | GNF-Pf-5460                       | Cc3cc(Nc1ccc(cc1)OCc2ccccc2)nc4cc(O)ccc34                                  | > 5000                    | <5.40                       | > 5000                | <5.40                      |
| 43       | nil, nil GNF-Pf-1823, GNF-Pf-3715 | CC1OC=CC=1C(=O)N/N=C/C(/Br)=C/c2ccccc2                                     | > 5000                    | <5.40                       | > 5000                | <5.40                      |
| 44       | GNF-Pf-4508                       | CC(C)CCNCC(O)CN3c1ccc(CI)cc1c2cc(CI)ccc23                                  | 561.2                     | 6.3                         | 509.0                 | 6.3                        |
| 45       | GNF-Pf-5639                       | COc1cc(ccc1OC)C2CC(=O)C4=C(C2)NC(C)=C(C(=O)OC3CCCC3)C4c5ccc(cc5)[N+][O-]=O | > 5000                    | <5.40                       | > 5000                | <5.40                      |
| 46       | GNF-Pf-4593                       | COc1ccc(cc1)Nc4nc(N/N=C/C2ccc(c2)[N+][O-])=O)nc(Nc3ccc(cc3)[N+][O-])=O)n4  | 852.9                     | 6.1                         | > 5000                | <5.40                      |
| 47       | GNF-Pf-4238                       | CN1CCN(CC1)c4nc(N/N=C/C2cc(l)ccc2O)nc(Nc3ccc(cc3)[N+][O-])=O)n4            | 63.7                      | 7.2                         | 221.0                 | 6.7                        |
| 48       | GNF-Pf-4194                       | CC1=C=C(C)N1c2cc(ccc2)C(=O)N/N=C/C4C=C(C3ccccc3)N(C=4c5ccccc5)c6ccc(C)cc6  | 1733.2                    | 5.8                         | 2189.0                | 5.7                        |
| 49       | GNF-Pf-71                         | O=C(NCCC1CCCC=1)c6cc5N=C(SCC3Nc2ccccc2N=3)N(c4ccccc4)C(=O)c5cc6            | > 5000                    | <5.40                       | > 5000                | <5.40                      |
| 50       | GNF-Pf-5543                       | CCC(O)C(=O)C2=C(C)NC1CC(CC(=O)C)=1C2c3ccc(CI)cc3)c4ccc(CI)cc4              | 279.5                     | 6.6                         | > 5000                | <5.40                      |

**Supplementary Table 1 (cont.).** Gametocytocidal activity of the resourced selected screening hits.

|     |                           |                         |                                                                      |        |       |        |       |
|-----|---------------------------|-------------------------|----------------------------------------------------------------------|--------|-------|--------|-------|
| 51  | GNF-Pf-4596               |                         | CCC2(C)CC(CCNc1cccc1O)(CCO2)c3cccc3OC                                | 634.0  | 6.2   | 750.0  | 6.1   |
| 52  | GNF-Pf-4070               |                         | COc1nnc(n1)c2cnnc(n2)SC                                              | 382.6  | 6.4   | > 5000 | <5.40 |
| 53  | GNF-Pf-3921, TCMDC-124347 |                         | CC2Nc1ccc(C)cc1C(=O)C=2Br                                            | 2786.1 | 5.6   | > 5000 | <5.40 |
| 54  | GNF-Pf-3254               |                         | CC(=O)N(c1ccc(F)c(F)c1)C3C(=O)c2cccc2C(=O)C=3N4CCOCC4                | > 5000 | <5.40 | > 5000 | <5.40 |
| 55  | GNF-Pf-5498               |                         | CCC(C)OC(=O)C2=C(C)NC1CC(C(=O)C=1C2c3cccc3F)c4ccc(Cl)cc4             | 123.0  | 6.9   | 597.0  | 6.2   |
| 56  | GNF-Pf-2288               |                         | CC(=O)N(c1cccc(Cl)c1)C3C(=O)c2cccc2C(=O)C=3N4CCOCC4                  | 3489.1 | 5.5   | > 5000 | <5.40 |
| 57  | GNF-Pf-739                |                         | COc(=O)c1ccc(cc1)C(=O)OCNC(=S)NC(=O)c2c(cccc2OC)OC                   | > 5000 | <5.40 | > 5000 | <5.40 |
| 58  | GNF-Pf-5037               |                         | O=C2c1cccc1Nc3ccc(F)cc23                                             | > 5000 | <5.40 | > 5000 | <5.40 |
| 59  | GNF-Pf-5557               |                         | COc1cccc(n1)c3ccc(O)c(CNCC2CCCC2)c3                                  | 738.9  | 6.1   | > 5000 | <5.40 |
| 60  | GNF-Pf-5631               |                         | CC(C)CNCc1cc(ccc1O)c2ccc(F)cc2                                       | 636.8  | 6.2   | 803.0  | 6.1   |
| 61  | GNF-Pf-5082               |                         | Oc1ccc(cc1)CNC3C2CC4CC(C2)CC3C4)c5ccccc5                             | 1899.5 | 5.7   | > 5000 | <5.40 |
| 62  | GNF-Pf-5045               |                         | Oc1ccc(cc1)CN2CCC(CC2)c3cccc3)c4cccc4                                | 2007.9 | 5.7   | > 5000 | <5.40 |
| 63  | GNF-Pf-4870               |                         | Oc1ccc(cc1)CNC2CC3C=CC2C34CC4)c6ccc5OCOC5c6                          | 630.0  | 6.2   | 897.0  | 6.0   |
| 64  | GNF-Pf-5616               |                         | COc1cccc(n1)c5ccc(O)c(CNCC2CC3C=CC2C34CC4)c5                         | 450.1  | 6.3   | 560.0  | 6.3   |
| 65  | GNF-Pf-5087               |                         | COc1ccc(OC)c(c1)c5ccc(O)c(CNCC2CC3C=CC2C34CC4)c5                     | 669.7  | 6.2   | 1072.0 | 6.0   |
| 66  | GNF-Pf-5659               |                         | COc1ccc(OC)c(c1)c4ccc(O)c(CN2CCC(CC2)c3cccc3)c4                      | 2048.9 | 5.7   | > 5000 | <5.40 |
| 67  | GNF-Pf-2168               |                         | [O-][N+](=O)c4ccc3nc(Nc1cccc1)c(Nc2cccc2)nc3c4                       | > 5000 | <5.40 | > 5000 | <5.40 |
| 68  | GNF-Pf-279                |                         | COC(=O)C1=C(OC)C(=O)OC12C=CC(=O)C=C2                                 | 959.9  | 6.0   | 181.0  | 6.7   |
| 69  | unknown                   |                         | CC(=O)NC1=NC(C)=C(S1)C3=CSC(Nc2ccc(Cl)cc2)=N3                        | 2068.0 | 5.7   | > 5000 | <5.40 |
| 70  | GNF-Pf-5294               | Vitas-M Laboratory, Ltd | CCNc1nc(NC(C)CC)nc(n1)ON=C(C)C                                       | 224.8  | 6.6   | 1431.0 | 5.8   |
| 71  | GNF-Pf-1532               |                         | CCN(CC)c2ccc1C=C(/C(/C)=N)NC(N)=S(C=O)Oc1c2                          | 515.2  | 6.3   | 365.0  | 6.4   |
| 72  | GNF-Pf-5427               | ChemDiv                 | Oc1ccc(cc1)CN2CCCCC2)c3cccc3                                         | 256.1  | 6.6   | 673.0  | 6.2   |
| 73  | GNF-Pf-2634               | AKos GmbH               | Oc2cc1cccc1cc2C(=O)Nc3cccc(Cl)c3                                     | 1088.3 | 6.0   | 2701.0 | 5.6   |
| 74  | unknown                   |                         | N=C3N(CCN1CCCC1)c2cccc2N3CC(O)c4ccc(Cl)c(Cl)c4                       | 1131.7 | 5.9   | 1877.0 | 5.7   |
| 75  | GNF-Pf-4917               |                         | OC(COc1cccc1C(=O)Nc2cccc2)CN5c3cccc3c4cccc45                         | 1607.9 | 5.8   | > 5000 | <5.40 |
| 76  | GNF-Pf-2943               |                         | [O-][N+](=O)C4=CC=C(/C=C/N)Nc3nc(Nc1cccc1)nc(Nc2cccc2)n3)O4          | 1186.0 | 5.9   | 549.0  | 6.3   |
| 77  | GNF-Pf-3626               |                         | COc4ccc3c(C)nc(Nc1nc(C)cc(n1)c2cccc2)nc3c4                           | > 5000 | <5.40 | > 5000 | <5.40 |
| 78  | GNF-Pf-4526               |                         | CN(C)CCCN4C(N)=C(C2Nc1cccc1N=2)c3nc(C#N)c(C#N)nc34                   | 961.8  | 6.0   | 1530.0 | 5.8   |
| 79  | GNF-Pf-2567               |                         | CCN(CC)c2ccc(CN1CCN(CC)CC1)cc2                                       | > 5000 | <5.40 | > 5000 | <5.40 |
| 80  | GNF-Pf-5666               |                         | CN1C(NNC(N)=S)C(NNC(N)=S)N(C)C1=O                                    | 21.3   | 7.7   | 1.3    | 8.9   |
| 81  | GNF-Pf-2329               |                         | Cc2c1cccc1c(C)c3cccc23                                               | 2348.2 | 5.6   | 984.0  | 6.0   |
| 82  | GNF-Pf-3600               |                         | CC(=O)N(c1ccc(F)cc1)C3C(=O)c2cccc2C(=O)C=3N(C)C                      | 243.3  | 6.6   | 588.0  | 6.2   |
| 83  | GNF-Pf-4055               |                         | CC(=O)N(c1ccc(F)c1)C3C(=O)c2cccc2C(=O)C=3N(C)C                       | 3124.4 | 5.5   | > 5000 | <5.40 |
| 84  | GNF-Pf-3020               |                         | CC(=O)N(c1ccc(Cl)c1)C3C(=O)c2cccc2C(=O)C=3N(C)C                      | 371.9  | 6.4   | 677.0  | 6.2   |
| 85  | GNF-Pf-3202               |                         | CC(=O)N(c1ccc(F)c(F)c1)C3C(=O)c2cccc2C(=O)C=3N(C)C                   | 425.1  | 6.4   | 380.0  | 6.4   |
| 86  | GNF-Pf-5634               |                         | C[C@@H]1CC[C@H]2[C@@H](C)[C@H](O)O[C@@H]3O[C@]4(C)CC[C@H]1C23O04     | 3.4    | 8.5   | 8.8    | 8.1   |
| 87  | GNF-Pf-4628, TCMDC-125542 |                         | Fc3ccc4SC(NC1=NC(=CS1)c2cccn2)=Nc34                                  | 3818.2 | 5.4   | 625.0  | 6.2   |
| 88  | GNF-Pf-3527, TCMDC-125541 |                         | COc4ccc3N=C(NC1=NC(=CS1)c2cccn2)Sc3c4                                | 4357.3 | <5.40 | 262.0  | 6.6   |
| 89  | GNF-Pf-4604               |                         | O=C(Nc1ccc(cc1)C3Nc2cccc2N=3)c4cccc(n4)C(=O)Nc5ccc(cc5)C7Nc6cccc6N=7 | 322.4  | 6.5   | 305.0  | 6.5   |
| 90  | GNF-Pf-4378               |                         | CCN4/C(=N/C(=O)C2=CC(=O)c1cccc1O2)/Sc3c(ccc(OC)c34)OC                | > 5000 | <5.40 | > 5000 | <5.40 |
| 91  | GNF-Pf-4808               |                         | CC(C)(C)NCC(O)CN3c1ccc(Cl)cc1c2cc(Cl)ccc23                           | 722.6  | 6.1   | 713.0  | 6.1   |
| 92  | GNF-Pf-5458               |                         | CC2(C)C1CC(C)C2(C)NC(=S)N/N=C/c3cccn3                                | > 5000 | <5.40 | 9.2    | 8.0   |
| 93  | GNF-Pf-5568               | ChemDiv                 | Oc1ccc(cc1)CNC2CCCC2)c3ccc(F)cc3                                     | 212.5  | 6.7   | 538.2  | 6.3   |
| 94  | GNF-Pf-5599               |                         | COc1ccc(OC)c(c1)c4ccc(O)c(CNCC2(C)CC3CC3)c4                          | 907.9  | 6.0   | 928.0  | 6.0   |
| 95  | GNF-Pf-4755               |                         | O=C(NC1CC1)C2CCN(CC2)c4cccc5C(=O)N(C3CCCCC3)C(=O)c45                 | > 5000 | <5.40 | > 5000 | <5.40 |
| 96  | GNF-Pf-5546               |                         | CC(C)OC(=O)c1cc(nc1nc1C)c2cccc2C(=O)N4CCN(C(=O)NC3CCCC3)C(C)C4       | > 5000 | <5.40 | > 5000 | <5.40 |
| 97  | GNF-Pf-5077               |                         | CC2=C=CN1C(NC(C)C)CC(C)C(=O)C(N=C1C=2)c3cccc3OC(=O)c4ccc(Br)cc4      | > 5000 | <5.40 | > 5000 | <5.40 |
| 98  | GNF-Pf-5072               |                         | COc1cc(cc(OC)c1OC)Nc2cncc(n2)c3ccc(cc3)C(N)=O                        | 270.4  | 6.6   | 639.0  | 6.2   |
| 99  | GNF-Pf-5356               |                         | N#Cc1ccc(cc1)c2cnc(N)c(n2)c3ccc(cc3)C(N)=O                           | > 5000 | <5.40 | > 5000 | <5.40 |
| 100 | GNF-Pf-188                |                         | N=C2NC(=O)/C=C/C=C/C1=CC=C(O1)[N+](O-)=O/S2                          | > 5000 | <5.40 | 820.0  | 6.1   |

**Supplementary Table 1 (cont.).** Gametocytocidal activity of the resourced selected screening hits.

|     |                                        |                                |                                                                         |             |            |              |            |
|-----|----------------------------------------|--------------------------------|-------------------------------------------------------------------------|-------------|------------|--------------|------------|
| 101 | GNF-Pf-4325                            |                                | COc2ccc(CCNCC(O)C1OC(C)=O)cc2                                           | 46.8        | 7.3        | 568.0        | 6.2        |
| 102 | MMV645672, TCMDC-123496, GNF-Pf-4583   |                                | OC4c1cccc1C5=Nc2cccc2SC(c3cccc3)C=45                                    | > 5000      | <5.40      | > 5000       | <5.40      |
| 103 | GNF-Pf-4816                            | AKos GmbH                      | CCCCCc3cc(O)c2C1CC(C)CCC=1C(=O)Oe2c3                                    | 1667.1      | 5.8        | 5133.0       | 5.3        |
| 104 | GNF-Pf-5523                            |                                | CCCN(CCC)CC(O)COc1cccc1C(=O)Nc2cccc2                                    | 685.2       | 6.2        | 1400.0       | 5.9        |
| 105 | GNF-Pf-3683                            |                                | OC(CNC1CCCC1)CN4c2cccc2c3cccc34                                         | 1403.3      | 5.9        | > 5000       | <5.40      |
| 106 | GNF-Pf-4323                            |                                | O=C(NC1=NC(=CS1)c2ccccn2)c3ccc(cc3)Oc4ccc(cc4)C(=O)NC5=NC(=CS5)c6ccccn6 | 535.0       | 6.3        | 99.0         | 7.0        |
| 107 | GNF-Pf-5629                            | AKos GmbH                      | CCOC(=O)C2=C(NC(=O)c1cccc1)Sc3c(O)C(CN(C)CC)ccc23                       | 224.3       | 6.6        | 438.0        | 6.4        |
| 108 | GNF-Pf-3195                            | Vitas-M Laboratory, Ltd        | COc2cc1nc(nc(N)c1cc2OC)N3CCN(CC3)c5nc(N)c4cc(OC)c(cc4n5)OC              | 154.7       | 6.8        | 330.0        | 6.5        |
| 109 | GNF-Pf-3625                            |                                | CN5C=C(C(C1=CC=CS1)C2=CN(C)C3cccc23)c4cccc45                            | > 5000      | <5.40      | 2055.0       | 5.7        |
| 110 | GNF-Pf-4773                            |                                | C2SC(Nc1ccccn1)=NC=2c3ccccn3                                            | > 5000      | <5.40      | 51.0         | 7.3        |
| 111 | GNF-Pf-3984                            |                                | COc5ccc(CNCC3=CC2C=NN(c1cccc1)C=2NC3=O)c4ccc(C)cc4)cc5                  | > 5000      | <5.40      | > 5000       | <5.40      |
| 112 | unknown                                |                                | Cc1ccc(C)c(c1)Nc4nc(NCc2cccc2)c3cccc3n4                                 | 2135.0      | 5.7        | > 5000       | <5.40      |
| 113 | unknown                                |                                | CC(C)(C)C3=NN(c1ccc(Cl)cc1)C4NC(=O)C(CNCc2cccc2)=CC3=4                  | 1219.2      | 5.9        | 1242.0       | 5.9        |
| 114 | unknown                                |                                | CC(C)(C)C3=NN(c1ccc(Cl)cc1)C4NC(=O)C(CNCc2ccc(Cl)cc2)=CC3=4             | 223.5       | 6.7        | 534.0        | 6.3        |
| 115 | GNF-Pf-3366                            | AKos GmbH                      | Cc4ccc(NC(=O)C1=CC(=CN(C1=O)c2ccc(C)cc2)C(=O)c3cc(Cl)ccc3O)c(C)c4       | 163.1       | 6.8        | 534.0        | 6.3        |
| 116 | GNF-Pf-1621                            | AKos GmbH                      | Cc1ccc(cc1C)NC(=O)C2=CC(=CN(C2=O)c3ccc(C)c(C)c3)C(=O)c4cc(Cl)ccc4O      | 150.5       | 6.8        | 278.0        | 6.6        |
| 117 | GNF-Pf-5323                            | Ryan Scientific Inc.           | COc1cccc1N3CCN(Cc2cc(C)C)c(C)cc2O)CC3                                   | 423.8       | 6.4        | 1597.0       | 5.8        |
| 118 | GNF-Pf-5527, SJ000087525               |                                | CCCN(C(=O)C(=O)Nc3ccc2N=C1CCCCN1C(=O)c2c3)c4ccc(cc4)OCC                 | 500.4       | 6.3        | > 5000       | <5.40      |
| 119 | GNF-Pf-5661                            |                                | CCOC(=O)C3C=C(c1ccc(cc1)OC)N(CCC(=O)Nc2cccc(c2)C(C)=O)C=3C              | 1814.0      | 5.7        | > 5000       | <5.40      |
| 120 | GNF-Pf-5392                            | AKos GmbH                      | CCOC(=O)C3C=C(c1ccc(F)cc1)N(CCC(=O)Nc2cccc(c2)C(=O)OCC)C=3C             | 789.7       | 6.1        | 1763.0       | 5.8        |
| 121 | GNF-Pf-5115                            | AKos GmbH                      | CCN(C(=O)C)SC1=NC(=NO1)c2ccc(cc2)C(C)C3cccc(C)c3                        | 502.7       | 6.3        | 1758.0       | 5.8        |
| 122 | GNF-Pf-3531                            |                                | COc1ccc(cc1)C3N=C(NC(=O)CS(=O)(=O)c2ccc(F)cc2)SC=3C                     | > 5000      | <5.40      | > 5000       | <5.40      |
| 123 | GNF-Pf-4133                            |                                | CN(C)CCNc1cc(nc2cccc12)c4ccc3cccc3c4                                    | > 5000      | <5.40      | > 5000       | <5.40      |
| 124 | GNF-Pf-4406, GNF-Pf-3381               |                                | CCN5/C(C=C/c2ccc1cccc1[n+])2CC)/C=CC4Sc3cccc3C=45                       | > 5000      | <5.40      | 123.0        | 6.9        |
| 125 | GNF-Pf-5483                            |                                | Cc2cc(N)c1cccc1[n+])2CCCCCCCC[n+])4c3cccc3c(N)cc4C                      | 1036.7      | 6.0        | > 5000       | <5.40      |
| 126 | GNF-Pf-2812                            |                                | COc1ccc(cc1)c4cc3C(=O)c2cccc2c3nn4                                      | 373.4       | 6.4        | > 5000       | <5.40      |
| 127 | GNF-Pf-4739, TCMDC-125769              |                                | Cc1ccnc(c1)NC2=NC(=CS2)c3ccccn3                                         | 584.9       | 6.2        | 68.0         | 7.2        |
| 128 | <b>GNF-Pf-5668</b>                     | <b>Vitas-M Laboratory, Ltd</b> | <b>CCOC(=O)C2=C(C)NC1CC(CC(=O)C)=1C2c3cccc3F)c4ccc(OC)c(c4)OC</b>       | <b>20.1</b> | <b>7.7</b> | <b>125.6</b> | <b>6.8</b> |
| 129 | GNF-Pf-1950                            |                                | CC3OC2C(=O)c1cccc1C(=O)C=2C=3C(=O)NC4CCS(=O)(=O)C4                      | > 5000      | <5.40      | 1380.0       | 5.9        |
| 130 | MMV665980, GNF-Pf-4228                 |                                | OC1CCCC1C2(CCCC2)N(C=O)Nc3cccc3                                         | > 5000      | <5.40      | > 5000       | <5.40      |
| 131 | GNF-Pf-3427                            |                                | CN1CCN(CC1)c2ccc(cc2)Nc5c3cccc3nc4cccc45                                | 1203.6      | 5.9        | > 5000       | <5.40      |
| 132 | MMV007907, GNF-Pf-3677                 |                                | Cc1ccc(cc1)NC2=NC(=CS2)c3ccccn3                                         | > 5000      | <5.40      | 352.0        | 6.5        |
| 133 | GNF-Pf-5633                            |                                | CCOC(=O)C2=C(C)NC1CC(CC(=O)C)=1C2c3ccc(Cl)cc3Cl)c4ccc(cc4)OC            | 509.4       | 6.3        | > 5000       | <5.40      |
| 134 | GNF-Pf-5533                            |                                | CCCCC(=O)N4C(c1ccc(cc1)C(F)F)C2(C)=O)CC(CC=2Nc3cccc34)c5ccc(OC)c(c5)OC  | 285.6       | 6.5        | > 5000       | <5.40      |
| 135 | GNF-Pf-4736, TCMDC-123596              |                                | COc1ccc(cc1)C4C(C(=O)Nc2cc(Cl)c(cc2OC)OC)c3cccc3C(=O)N4C                | 2922.0      | 5.5        | > 5000       | <5.40      |
| 136 | GNF-Pf-4229                            |                                | Cc3ccc(/N=N/C2=NC1cccc1N2C)c(C)c3                                       | 264.4       | 6.6        | > 5000       | <5.40      |
| 137 | GNF-Pf-4543, MMV006389                 |                                | O=C4c1cccc1C5=Nc2cccc2SC(c3ccc(F)c3)C45                                 | > 5000      | <5.40      | > 5000       | <5.40      |
| 138 | GNF-Pf-5637                            | ChemDiv                        | C=CC1CN2CCC1C(C2)C(O)c3ccnc4ccc(cc34)OC                                 | 114.5       | 6.9        | 366.0        | 6.4        |
| 139 | <b>GNF-Pf-5310</b>                     | <b>Ryan Scientific Inc.</b>    | <b>CC(C)(C)c2ccc(O)c(CNC1CCCC1)c2</b>                                   | <b>54.1</b> | <b>7.3</b> | <b>163.6</b> | <b>6.7</b> |
| 140 | GNF-Pf-5561                            |                                | C=CC12CCN(CC1)C(C2)C(O)c3ccnc4ccc(cc34)OC                               | 199.6       | 6.7        | 238.0        | 6.6        |
| 141 | unknown                                |                                | CC(C)N2CCC1C(C(N)=O)=C(NC(=O)C(C)C)SC=1C2                               | > 5000      | <5.40      | > 5000       | <5.40      |
| 142 | GNF-Pf-3788                            |                                | CNC2C(=O)c1cccc1C(=O)C=2N(Cc3ccc(Cl)c(Cl)c3)C(C)=O                      | 254.4       | 6.6        | 30.0         | 7.5        |
| 143 | same as NVP-LJA590-AA-1                |                                | C=CC1CN2CCC1CC2[C@H](O)c3ccnc4ccc(cc34)OC                               | 526.9       | 6.3        | > 5000       | <5.40      |
| 144 | GNF-Pf-237                             |                                | O=C(c1ccnc1)N2N=C(CC2c3cccc3)C5(C=O)Nc4ccc(Br)cc4C=5c6cccc6             | > 5000      | <5.40      | > 5000       | <5.40      |
| 145 | MMV007127, GNF-Pf-5290                 |                                | OC4c1cccc1C5=Nc2cccc2SC(c3ccc(Br)c3)C=45                                | > 5000      | <5.40      | > 5000       | <5.40      |
| 146 | GNF-Pf-4684, TCMDC-125391, GNF-Pf-4105 |                                | CN(C)c2ccc(/C=C/C(=O)NC(=O)c1cccc1O)cc2                                 | > 5000      | <5.40      | 70.7         | 7.2        |
| 147 | GNF-Pf-2632, GNF-Pf-4835               |                                | CCN(CC)c2ccc(/C=C/C1cccc[n+])1CC)cc2                                    | > 5000      | <5.40      | 366.0        | 6.4        |
| 148 | TCMDC-124060, GNF-Pf-5669              |                                | OC4c1cccc1C5=Nc2cccc2SC(C3=CC=CS3)C=45                                  | > 5000      | <5.40      | 1540.0       | 5.8        |
| 149 | GNF-Pf-5371                            |                                | COc1ccc(cc1)C(OCCS(=O)(=O)CCO)(c2cccc2)c3ccc(cc3)OC                     | > 5000      | <5.40      | > 5000       | <5.40      |

The compounds selected for profiling are highlighted. Commercial source is indicated for compounds that were purchased as solids, remaining compounds were provided by NITD as DMSO stocks. Early GAM: stage I gametocyte; late GAM: stage IV gametocyte; pIC50: equals to -log(IC50). Early GAM: stage I gametocyte; late GAM: stage IV gametocyte; pIC50: equals to -log(IC50).

**Supplementary Table 2.** Activity of early- and late-stage GAM assay controls.

|                    | NF54 <sup>Pfs16</sup> early GAM |       | NF54 <sup>Pfs16</sup> late GAM |       |
|--------------------|---------------------------------|-------|--------------------------------|-------|
|                    | mean IC <sub>50</sub> (μM)      | SEM   | mean IC <sub>50</sub> (μM)     | SEM   |
| Puromycin          | 0.096                           | 0.012 | 0.043                          | 0.004 |
| Dihydroartemisinin | 0.006                           | 0.001 | ND                             | -     |
| Chloroquine        | 0.164                           | 0.043 | > 40 μM                        | -     |
| Pyrimethamine      | > 40 μM                         | -     | > 40 μM                        | -     |
| Primaquine         | > 20 μM                         | -     | ND                             | -     |

GAM: gametocytes; ND: not done; SEM: standard error of the mean based on 2 independent repeats performed in triplicate or duplicate for each parasite stage.

**Supplementary Table 3.** Activity profile of the 4 compounds of interest identified by screening the GNF-Novartis Malaria Box.

|             | Gametocyte IC <sub>50</sub> (nM) |     |                                |      | Asexual blood stage IC <sub>50</sub> (nM) |     |                       |     |                             |     | HEK-293<br>cytotoxicity |
|-------------|----------------------------------|-----|--------------------------------|------|-------------------------------------------|-----|-----------------------|-----|-----------------------------|-----|-------------------------|
|             | NF54 <sup>Pfs16</sup> early GAM  |     | NF54 <sup>Pfs16</sup> late GAM |      | 3D7                                       |     | Dd2                   |     | NITD609-R <sup>Dd2</sup> #2 |     |                         |
|             | mean IC <sub>50</sub>            | SEM | mean IC <sub>50</sub>          | SEM  | mean IC <sub>50</sub>                     | SEM | mean IC <sub>50</sub> | SEM | mean IC <sub>50</sub>       | SEM |                         |
| GNF-Pf-5640 | 15.1                             | 0.9 | 92.1                           | 14.4 | 4.0                                       | 0.4 | 7.5                   | 1.3 | 7.8                         | 1.1 | 50%                     |
| GNF-Pf-5660 | 14.4                             | 0.3 | 132.0                          | 50.5 | 3.3                                       | 0.4 | 3.6                   | 1.1 | 5.4                         | 0.8 | <5%                     |
| GNF-Pf-5668 | 20.1                             | 0.5 | 125.6                          | 40.4 | 5.5                                       | 0.5 | 6.9                   | 1.2 | 11.2                        | 1.8 | 45%                     |
| GNF-Pf-5310 | 54.1                             | 2.2 | 163.6                          | 40.4 | 22.1                                      | 1.9 | 24.0                  | 6.3 | 21.7                        | 2.9 | 41%                     |

Early and late GAM stages refer to stages I and IV respectively. SEM: standard error of the mean based on 2 independent repeats performed in triplicate or duplicate for each parasite stage and strain. HEK-293 values show the percent inhibition at 40  $\mu$ M.

**Supplementary Table 4a.** Transmission-blocking activity of HHQs.

| assay           | drug        | pressure            | % reduction infected mosquitoes |      |   |         | % reduction oocyst numbers |      |   |         | % inhibition exflagellation |      |   |         |
|-----------------|-------------|---------------------|---------------------------------|------|---|---------|----------------------------|------|---|---------|-----------------------------|------|---|---------|
|                 |             |                     | mean IC <sub>50</sub>           | SEM  | n | P value | mean IC <sub>50</sub>      | SEM  | n | P value | mean IC <sub>50</sub>       | SEM  | n | P value |
| <i>in vitro</i> | GNF-Pf-5660 | 1x IC <sub>50</sub> | -18.5                           | 12.9 | 2 | >0.9999 | 58.1                       | 15.4 | 2 | 0.0985  | 22.1                        | 26.7 | 2 | >0.9999 |
|                 |             | 3x IC <sub>50</sub> | 97.2                            | 2.8  | 2 | <0.0001 | 100.0                      | 0.1  | 2 | 0.0019  | 97.7                        | 2.3  | 2 | 0.0104  |
|                 | GNF-Pf-5668 | 1x IC <sub>50</sub> | 18.0                            | 12.4 | 2 | >0.9999 | 67.1                       | 4.0  | 2 | 0.0416  | 47.5                        | 33.9 | 2 | 0.5127  |
|                 |             | 3x IC <sub>50</sub> | 57.1                            | 11.2 | 2 | 0.0027  | 95.0                       | 3.7  | 2 | 0.0030  | 70.2                        | 8.9  | 2 | 0.0903  |
|                 | GNF-Pf-5310 | 1x IC <sub>50</sub> | -5.3                            | 23.4 | 2 | >0.9999 | 14.1                       | 52.2 | 2 | >0.9999 | 19.4                        | 14.7 | 2 | >0.9999 |
|                 |             | 3x IC <sub>50</sub> | 7.2                             | 7.8  | 2 | >0.9999 | 73.4                       | 4.4  | 2 | 0.0228  | -8.7                        | 41.3 | 2 | >0.9999 |
|                 | MB          | 3x IC <sub>50</sub> | 100.0                           | 0.0  | 2 | <0.0001 | 100.0                      | 0.0  | 2 | 0.0019  | 100.0                       | -    | 1 | 0.0366  |
| <i>in vivo</i>  | GNF-Pf-5660 | 100 mg/kg           | 24.7                            | 21.0 | 2 | 0.5676  | 21.1                       | 44.2 | 2 | >0.9999 | -0.1                        | 16.9 | 2 | >0.9999 |
|                 | GNF-Pf-5668 | 100 mg/kg           | 1.6                             | 3.0  | 2 | >0.9999 | 6.8                        | 33.3 | 2 | >0.9999 | 31.1                        | 1.2  | 2 | 0.0585  |
|                 | DHA         | 20 mg/kg            | 64.8                            | 19.7 | 2 | 0.0245  | 75.1                       | 22.4 | 2 | 0.2174  | -11.4                       | 2.1  | 2 | 0.8744  |

*In vitro* assays were performed using the standard membrane feeding assay with *P. falciparum* parasites and the *in vivo* assay involved CD1 mice infected with *P. berghei* parasites. Statistical significance was assessed using a Welch's corrected t-test with Bonferroni-Dunn adjusted *P* values for multiple comparisons when applicable. MB: methylene blue; DHA: dihydroartemisinin; SEM: standard error of the mean.

**Supplementary Table 4b.** *In vivo* asexual blood stage activity of HHQs.

|                | drug        | pressure  | 4-day Peters test     |      |     |          | 2-dose test           |      |     |         |        |
|----------------|-------------|-----------|-----------------------|------|-----|----------|-----------------------|------|-----|---------|--------|
|                |             |           | mean IC <sub>50</sub> | SEM  | n   | P value  | mean IC <sub>50</sub> | SEM  | n   | P value |        |
| <i>in vivo</i> | GNF-Pf-5660 | 70 mg/kg  | 21.5                  | 1.2  | 2   | < 0.0001 | -                     | -    | -   | -       |        |
|                |             | 100 mg/kg | 65.0                  | -    | 1   | < 0.0001 | 7.7                   | 1.7  | 2   | >0.9999 |        |
|                | GNF-Pf-5668 | 70 mg/kg  | 42.8                  | 1.1  | 2   | < 0.0001 | -                     | -    | -   | -       |        |
|                |             | 100 mg/kg | 91.1                  | -    | 1   | < 0.0001 | 34.9                  | 16.5 | 2   | 0.0323  |        |
|                |             | DHA       | 30 mg/kg              | 98.7 | 1.0 | 3        | < 0.0001              | 99.6 | 0.4 | 2       | 0.0001 |

Data are expressed as % inhibition versus a DMSO-treated control. Statistical significance was assessed using a Welch's corrected t-test with Bonferroni-Dunn adjusted *P* values for multiple comparisons. ABS: asexual blood stage; DHA: dihydroartemisinin; SEM: standard error of the mean.



**Supplementary Table 4c.** Detailed *in vivo* transmission-blocking data of all treatment groups.

| experiment | mouse | % infected mosquitoes |             |             |      | average # oocysts / infected mosquito |             |             |     | average exflagellation centers per 100 cells |             |             |     |
|------------|-------|-----------------------|-------------|-------------|------|---------------------------------------|-------------|-------------|-----|----------------------------------------------|-------------|-------------|-----|
|            |       | solvent               | GNF-Pf-5660 | GNF-Pf-5668 | DHA  | solvent                               | GNF-Pf-5660 | GNF-Pf-5668 | DHA | solvent                                      | GNF-Pf-5660 | GNF-Pf-5668 | DHA |
| 1          | 1     | 75.0                  | 83.3        | 80.0        | 20.0 | 62.9                                  | 34.6        | 26.1        | 1.8 | 5.8                                          | 3.8         | 1.3         | 5.1 |
|            | 2     | 95.0                  | 85.0        | 95.0        | 25.0 | 56.2                                  | 82.2        | 70.3        | 1.6 | 4.1                                          | 5.4         | 2.2         | 5.1 |
|            | 3     | 100.0                 | 90.0        | 90.0        | 10.0 | 29.4                                  | 36.4        | 39.9        | 1.0 | 4.3                                          | 2.6         | 3.4         | 4.7 |
|            | 4     | 85.0                  | 83.3        | 95.0        | 0.0  | 25.0                                  | 60.3        | 82.9        | 0.0 | 3.4                                          | 2.8         | 5.4         | -   |
| 2          | 1     | 30.0                  | 23.1        | 28.6        | 27.3 | 3.5                                   | 1.0         | 1.5         | 1.0 | 7.2                                          | 7.1         | 5.4         | 4.0 |
|            | 2     | 50.0                  | 35.0        | 63.6        | 20.0 | 8.5                                   | 2.4         | 3.0         | 1.7 | 4.0                                          | 10.8        | 2.4         | 6.9 |
|            | 3     | 52.9                  | 20.0        | 50.0        | 36.4 | 3.2                                   | 1.3         | 3.3         | 4.3 | 7.0                                          | 4.3         | 7.2         | 6.8 |
|            | 4     | 65.0                  | 29.4        | 46.7        | 25.0 | 2.5                                   | 1.4         | 2.9         | 1.5 | 7.1                                          | -           | 2.1         | 9.9 |

**Supplementary Table 5.** IC<sub>50</sub> data of the selected lines and genetically engineered (edited) lines against HHQs.

| Line (allele balance)                           | GNF-Pf-5640           |       |    |                         |           | GNF-Pf-5660           |       |   |                         |           | GNF-Pf-5668           |       |   |                         |           |
|-------------------------------------------------|-----------------------|-------|----|-------------------------|-----------|-----------------------|-------|---|-------------------------|-----------|-----------------------|-------|---|-------------------------|-----------|
|                                                 | Mean IC <sub>50</sub> | SEM   | n  | Fold shift vs wild-type | P value   | Mean IC <sub>50</sub> | SEM   | n | Fold shift vs wild-type | P value   | Mean IC <sub>50</sub> | SEM   | n | Fold shift vs wild-type | P value   |
| Dd2-B2                                          | 13.2                  | 2.1   | 10 | 1.0                     | n/a       | 15.1                  | 1.6   | 8 | 1.0                     | n/a       | 23.0                  | 3.9   | 8 | 1.0                     | n/a       |
| 5668-3C4D2 (F1072L 69%)*                        | 442.7                 | 43.8  | 4  | 33.7                    | 8.268E-09 | 939.8                 | 115.5 | 5 | 62.1                    | 2.949E-06 | 846.1                 | 85.2  | 5 | 36.8                    | 4.459E-07 |
| F1072L edited (F1072L 100%)                     | 588.2                 | 37.2  | 7  | 44.7                    | 5.165E-11 | 892.2                 | 18.0  | 3 | 58.9                    | 1.27E-13  | 908.1                 | 26.1  | 3 | 39.5                    | 5.875E-12 |
| 5640-2C4C3 (S1075I 59%)                         | 1012.4                | 107.3 | 4  | 77.0                    | 1.36E-08  | 658.8                 | 81.1  | 5 | 43.5                    | 3.219E-06 | 1623.8                | 107.3 | 5 | 70.7                    | 4.501E-09 |
| S1075I edited (S1075I 100%)                     | 1460.8                | 49.6  | 3  | 111.1                   | 2.4E-14   | 642.0                 | 22.1  | 3 | 42.4                    | 1.514E-11 | 1742.1                | 113.4 | 3 | 75.8                    | 3.487E-09 |
| 5640-3H9C7 (Y290F 50%)                          | 1039.1                | 171.2 | 4  | 79.0                    | 1.886E-06 | 2792.2                | 148.7 | 5 | 184.4                   | 3.952E-10 | 1955.2                | 183.6 | 5 | 85.1                    | 1.791E-07 |
| 5660-2B6H1 (Y290F 100%)                         | 1382.6                | 163.0 | 4  | 105.1                   | 4.393E-08 | 3750.2                | 338.7 | 5 | 247.7                   | 1.094E-07 | 2373.4                | 89.5  | 5 | 103.3                   | 9.979E-12 |
| NF54                                            | 6.7                   | 0.2   | 4  | 1.0                     | n/a       | 12.0                  | 0.4   | 4 | 1.0                     | n/a       | 9.9                   | 0.5   | 4 | 1.0                     | n/a       |
| NF54-Y290F (Y290F 100%)                         | 2239.3                | 29.9  | 3  | 332.4                   | 0.0002    | 5247.5                | 163.2 | 4 | 437.2                   | <0.0001   | 2313.7                | 19.0  | 3 | 233.1                   | <0.0001   |
| FCB                                             | 9.8                   | 1.0   | 4  | 1.0                     | n/a       | 18.3                  | 1.5   | 4 | 1.0                     | n/a       | 12.4                  | 1.1   | 4 | 1.0                     | n/a       |
| KD1 <sup>mdr1</sup> ( <i>pfmdr1</i> knock-down) | 9.7                   | 1.1   | 4  | 1.0                     | 0.9368    | 17.1                  | 1.3   | 4 | 0.9                     | 0.6       | 12.4                  | 0.4   | 4 | 1.0                     | 0.9886    |

All values are given in nM. \*: This strain also has four copies of *pfmdr1*, compared to two copies in the Dd2-B2 parent; SEM: standard error of the mean; n: number of repeated experiments; P value vs Dd2-B2: Welch's t-test corrected for multiple comparisons using the Bonferroni-Dunn method; P value vs NF54 or FCB: Welch's t test; n/a.: not applicable.

**Supplementary Table 6.** IC<sub>90</sub> data of the selected lines and genetically engineered (edited) lines against HHQs.

| Line (allele balance)                           | GNF-Pf-5640           |        |    |                         |           | GNF-Pf-5660           |        |   |                         |           | GNF-Pf-5668           |       |   |                         |           |
|-------------------------------------------------|-----------------------|--------|----|-------------------------|-----------|-----------------------|--------|---|-------------------------|-----------|-----------------------|-------|---|-------------------------|-----------|
|                                                 | Mean IC <sub>90</sub> | SEM    | n  | Fold shift vs wild-type | P value   | Mean IC <sub>90</sub> | SEM    | n | Fold shift vs wild-type | P value   | Mean IC <sub>90</sub> | SEM   | n | Fold shift vs wild-type | P value   |
| Dd2-B2                                          | 47.0                  | 4.1    | 12 | 1.0                     | n/a       | 67.1                  | 4.7    | 8 | 1.0                     | n/a       | 97.4                  | 30.2  | 8 | 1.0                     | n/a       |
| 5668-3C4D2 (F1072L 69%)*                        | 2553.5                | 157.9  | 4  | 54.3                    | 3.04E-13  | 3792.2                | 452.4  | 5 | 56.5                    | 2.227E-06 | 2766.8                | 172.0 | 5 | 28.4                    | 4.511E-09 |
| F1072L edited (F1072L 100%)                     | 2675.3                | 239.2  | 7  | 56.9                    | 2.587E-10 | 3486.0                | 338.9  | 3 | 52.0                    | 1.229E-07 | 2645.0                | 95.4  | 3 | 27.2                    | 4.033E-10 |
| 5640-2C4C3 (S1075I 59%)                         | 7317.0                | 2600.1 | 4  | 155.5                   | 0.0007633 | 2402.6                | 290.7  | 5 | 35.8                    | 2.858E-06 | 4654.8                | 270.6 | 5 | 47.8                    | 1.448E-09 |
| S1075I edited (S1075I 100%)                     | 3648.7                | 87.6   | 3  | 77.6                    | <01E-15   | 1950.3                | 104.4  | 3 | 29.1                    | 7.678E-10 | 3376.7                | 174.5 | 3 | 34.7                    | 1.468E-09 |
| 5640-3H9C7 (Y290F 50%)                          | 6451.8                | 1785.1 | 4  | 137.1                   | 5.945E-05 | 11018.6               | 3792.1 | 5 | 164.2                   | 0.0190308 | 4217.8                | 308.0 | 5 | 43.3                    | 1.631E-08 |
| 5660-2B6H1 (Y290F 100%)                         | 6241.3                | 901.3  | 4  | 132.7                   | 2.307E-08 | 10029.2               | 1475.6 | 5 | 149.5                   | 1.596E-05 | 4676.4                | 92.1  | 5 | 48.0                    | 3.7E-14   |
| NF54                                            | 15.8                  | 0.7    | 4  | 1.0                     | n/a       | 31.0                  | 1.9    | 4 | 1.0                     | n/a       | 24.4                  | 1.2   | 4 | 1.0                     | n/a       |
| NF54-Y290F (Y290F 100%)                         | 4123.3                | 259.0  | 3  | 260.9                   | 0.0040    | 11209.7               | 208.0  | 3 | 361.4                   | 0.0003    | 4350.33               | 316.2 | 3 | 178.1                   | 0.0053    |
| FCB                                             | 50.3                  | 4.8    | 4  | 1.0                     | n/a       | 152.4                 | 38.6   | 4 | 1.0                     | n/a       | 93.2                  | 26.2  | 4 | 1.0                     | n/a       |
| KD1 <sup>mdr1</sup> ( <i>pfmdr1</i> knock-down) | 33.9                  | 0.8    | 4  | 0.7                     | 0.0393    | 84.8                  | 3.0    | 4 | 0.6                     | 0.1780    | 57.4                  | 6.6   | 4 | 0.6                     | 0.2681    |

All values are given in nM. \*: This strain also has four copies of *pfmdr1*, compared to two copies in the Dd2-B2 parent; SEM: standard error of the mean; n: number of repeated experiments; P value vs Dd2-B2: Welch's t-test corrected for multiple comparisons using the Bonferroni-Dunn method; P value vs NF54 or FCB: Welch's t test; n/a.: not applicable.

**Supplementary Table 7.** IC<sub>50</sub> data of early GAM stage NF54 and NF54-Y290F lines against HHQs.

| Line (allele balance)   | GNF-Pf-5640 |                |   |                         |        | GNF-Pf-5660    |                  |   |                         |                | GNF-Pf-5668      |       |   |                         |        |
|-------------------------|-------------|----------------|---|-------------------------|--------|----------------|------------------|---|-------------------------|----------------|------------------|-------|---|-------------------------|--------|
|                         | Mean        |                | n | Fold shift vs wild-type |        | Mean           |                  | n | Fold shift vs wild-type |                | Mean             |       | n | Fold shift vs wild-type |        |
| IC <sub>50</sub>        | SEM         | <i>P</i> value |   | IC <sub>50</sub>        | SEM    | <i>P</i> value | IC <sub>50</sub> |   | SEM                     | <i>P</i> value | IC <sub>50</sub> | SEM   |   | <i>P</i> value          |        |
| NF54                    | 192.1       | 133.9          | 2 | 1.0                     | n/a    | 249.8          | 122.3            | 2 | 1.0                     | n/a            | 293.3            | 98.4  | 2 | 1.0                     | n/a    |
| NF54-Y290F (Y290F 100%) | 14251.5     | 2492.5         | 2 | 74.2                    | 0.0301 | 10063.5        | 921.5            | 2 | 40.3                    | 0.0089         | 13943.5          | 973.5 | 2 | 47.5                    | 0.0051 |

All values are given in nM. \*: SEM: standard error of the mean; n: number of repeated experiments; *P* value vs NF54: unpaired t-test.

**Supplementary Table 8.** Minimum estimated energy required for docking of HHQs to wild-type and mutated PfMDR1.

| Compound    | PfMDR1    | Minimum estimated energy (kcal/mol) |
|-------------|-----------|-------------------------------------|
| GNF-Pf-5640 | wild-type | -5.44                               |
|             | 290F      | -6.08                               |
|             | 1072L     | -5.25                               |
|             | 1075I     | -6.20                               |
| GNF-Pf-5660 | wild-type | -6.46                               |
|             | 290F      | -6.49                               |
|             | 1072L     | -7.30                               |
|             | 1075I     | -6.23                               |
| GNF-Pf-5668 | wild-type | -5.96                               |
|             | 290F      | -7.00                               |
|             | 1072L     | -7.71                               |
|             | 1075I     | -5.90                               |

**Supplementary Table 9.** Interactions of GNF-Pf-5640 with wild-type and mutated PfMDR1.

| wild-type PfMDR1                  |                                           |                                           |                                         | PfMDR1-290F                                           |                                          |                                        |                                            |
|-----------------------------------|-------------------------------------------|-------------------------------------------|-----------------------------------------|-------------------------------------------------------|------------------------------------------|----------------------------------------|--------------------------------------------|
| hydrogen bonds                    | hydrophobic                               | pi-pi                                     | other                                   | polar                                                 | hydrophobic                              | pi-pi                                  | other                                      |
| N1 (6) - TYR803<br>[3.29] - (OH)  | C27 (33) - ILE286 (CG2)<br>[3.54]         | C19 (25) - TYR810<br>[3.35] - (CD2, CE2)  | O3 (3) - ILE286<br>[3.48] - (CG2)       | O4 (4) - SER1075<br>[3.84] - (OG)                     | C16 (22) - ILE286<br>[3.39] - (CD1, CG2) | C22 (28) - TYR803<br>[3.82] - (CZ)     | O3 (3) - PHE290<br>[3.66] - (CD1, CE1, CZ) |
| H1 (36) - TYR803<br>[2.96] - (OH) | C26 (32) - LEU287 (CD2)<br>[3.51]         | C24 (30) - TYR810<br>[3.58] - (CD2)       | C10 (16) - TYR803<br>[3.87] - (OH)      | C27 (33) - ILE286<br>[3.61] - (CG2)                   | C17 (23) - TYR803<br>[3.84] - (CZ)       | C2 (8) - TYR803<br>[3.84] - (OH)       |                                            |
|                                   | C27 (33) - LEU287 (CD2)<br>[3.51]         | C19 (25) - PHE1068<br>[3.45] - (CD2, CE2) | O4 (4) - ILE1071<br>[3.50] - (CG2)      | C27 (33) - LEU287<br>[3.37] - (CD2)                   | C19 (25) - PHE1068<br>[3.75] - (CD2)     | C3 (9) - TYR803<br>[3.86] - (OH)       |                                            |
|                                   | C27 (33) - TYR290 (CB, CG)<br>[3.24]      | C24 (30) - PHE1068<br>[3.16] - (CD2, CE2) | C28 (34) - SER1075<br>[2.97] - (CB, OG) | C27 (33) - PHE290<br>[3.12] - (CB, CD2, CG)           | C13 (19) - PHE1072<br>[3.69] - (CE1)     | C5 (11) - TYR803<br>[3.63] - (OH)      |                                            |
|                                   | C26 (32) - PHE806 (CD2, CE2)<br>[3.17]    | C22 (28) - PHE1068<br>[3.41] - (CD2, CE2) |                                         | C25 (31) - PHE290<br>[3.81] - (CG)                    |                                          | C22 (28) - TYR803<br>[3.59] - (OH)     |                                            |
|                                   | C27 (33) - PHE806 (CE2)<br>[3.68]         | C13 (19) - PHE1072<br>[3.53] - (CE1)      |                                         | C27 (33) - PHE806<br>[3.56] - (CE2)                   |                                          | C17 (23) - TYR803<br>[3.15] - (OH)     |                                            |
|                                   | C26 (32) - TYR810 (CB, CD1, CG)<br>[3.59] |                                           |                                         | C24 (30) - ALA807<br>[3.21] - (CB)                    |                                          | O1 (1) - PHE1072<br>[3.44] - (CE1, CZ) |                                            |
|                                   | C28 (34) - ILE1071<br>[3.40] - (CG2)      |                                           |                                         | C26 (32) - TYR290<br>[3.19] - (CD1, CD2, CE1, CG, CZ) |                                          | O4 (4) - SER1075<br>[3.75] - (CB)      |                                            |
|                                   | C28 (34) - PHE1072<br>[3.63] - (CD1)      |                                           |                                         | C21 (27) - PHE1068<br>[3.31] - (CD2, CE2, CZ)         |                                          |                                        |                                            |
|                                   | C1 (7) - PHE1072<br>[3.60] - (CE1)        |                                           |                                         | C1 (7) - PHE1072<br>[3.25] - (CE1, CZ)                |                                          |                                        |                                            |
|                                   | C2 (8) - PHE1072<br>[3.64] - (CE1, CZ)    |                                           |                                         | C6 (12) - PHE1072<br>[3.30] - (CE1, CZ)               |                                          |                                        |                                            |
|                                   |                                           |                                           |                                         | C7 (13) - PHE1072<br>[3.35] - (CE1, CZ)               |                                          |                                        |                                            |

  

| PfMDR1-1072L                     |                                            |                                          |                                         | PfMDR1-1075I                                |                                     |                                                      |  |
|----------------------------------|--------------------------------------------|------------------------------------------|-----------------------------------------|---------------------------------------------|-------------------------------------|------------------------------------------------------|--|
| polar                            | hydrophobic                                | pi-pi                                    | other                                   | hydrophobic                                 | pi-pi                               | other                                                |  |
| O1 (1) - TYR803<br>[3.28] - (OH) | C26 (32) - ILE286 (CG2)<br>[3.12]          | C19 (25) - TYR803<br>[3.75] - (CE1, CZ)  | C3 (9) - TYR803<br>[3.57] - (OH)        | C26 (32) - ILE286<br>[3.27] - (CG2)         | C22 (28) - TYR803<br>[3.64] - (CZ)  | O2 (2) - ILE286<br>[3.82] - (CG2)                    |  |
|                                  | C25 (31) - LEU287 (CD2)<br>[3.88]          | C24 (30) - TYR803<br>[3.22] - (CE1, CZ)  | C6 (12) - TYR803<br>[3.78] - (OH)       | C25 (31) - LEU287<br>[3.90] - (CD2)         | C24 (30) - PHE806<br>[3.64] - (CD2) | O3 (3) - TYR290<br>[3.37] - (CD2, CE2, CZ)           |  |
|                                  | C26 (32) - LEU287 (CD2)<br>[3.63]          | C22 (28) - TYR803<br>[3.41] - (CE1, CZ)  | C7 (13) - TYR803<br>[3.19] - (OH)       | C26 (32) - LEU287<br>[3.64] - (CD2)         | C9 (15) - PHE1072<br>[3.80] - (CE1) | C22 (28) - TYR803<br>[3.43] - (OH)                   |  |
|                                  | C27 (33) - LEU287 (CD2)<br>[3.78]          | C19 (25) - PHE806<br>[2.88] - (CD2, CE2) | C11 (17) - TYR803<br>[3.44] - (OH)      | C27 (33) - LEU287<br>[3.27] - (CD2)         |                                     | C17 (23) - TYR803<br>[3.38] - (OH)                   |  |
|                                  | C26 (32) - TYR290 (CB, CG)<br>[3.35]       | C24 (30) - PHE806<br>[3.27] - (CD2, CE2) | C12 (18) - TYR803<br>[3.83] - (OH)      | C27 (33) - TYR290<br>[3.33] - (CB, CD1, CG) |                                     | O1 (1) - PHE1068<br>[3.24] - (CD1, CD2, CE1, CG, CZ) |  |
|                                  | C25 (31) - PHE806 (CE2)<br>[3.77]          |                                          | C24 (30) - TYR803<br>[3.88] - (OH)      | C25 (31) - PHE806<br>[3.81] - (CE2)         |                                     | O1 (1) - PHE1072<br>[3.43] - (CZ)                    |  |
|                                  | C26 (32) - PHE806 (CE2)<br>[3.81]          |                                          | C22 (28) - TYR803<br>[3.50] - (OH)      | C26 (32) - PHE806<br>[3.56] - (CE2)         |                                     |                                                      |  |
|                                  | C27 (33) - PHE806 (CE2)<br>[3.53]          |                                          | C17 (23) - TYR803<br>[3.24] - (OH)      | C27 (33) - PHE806<br>[3.41] - (CE2, CZ)     |                                     |                                                      |  |
|                                  | C21 (27) - ALA807 (CB)<br>[3.22]           |                                          | O3 (3) - TYR810<br>[3.84] - (CE2)       | C19 (25) - ALA807<br>[3.60] - (CB)          |                                     |                                                      |  |
|                                  | C27 (33) - TYR810 (CD1, CE1, CG)<br>[3.34] |                                          | O1 (1) - LEU1072<br>[3.45] - (CD1, CD2) | C24 (30) - ALA807<br>[3.31] - (CB)          |                                     |                                                      |  |
|                                  | C28 (34) - ILE1071<br>[3.46] - (CG2)       |                                          | C29 (35) - SER1075<br>[3.65] - (CB)     | C27 (33) - TYR810<br>[3.87] - (CD1)         |                                     |                                                      |  |
|                                  | C6 (12) - LEU1072<br>[3.11] - (CD2, CG)    |                                          |                                         | C21 (27) - TYR810<br>[3.35] - (CD2, CE2)    |                                     |                                                      |  |
|                                  | C1 (7) - LEU1072<br>[3.75] - (CD2)         |                                          |                                         | C21 (27) - PHE1068<br>[3.49] - (CD2, CE2)   |                                     |                                                      |  |
|                                  | C7 (13) - LEU1072<br>[3.88] - (CD2)        |                                          |                                         | C1 (7) - PHE1072<br>[3.32] - (CE1, CZ)      |                                     |                                                      |  |
|                                  | C15 (21) - LEU1072<br>[3.78] - (CD2)       |                                          |                                         | C6 (12) - PHE1072<br>[3.42] - (CE1, CZ)     |                                     |                                                      |  |
|                                  |                                            |                                          |                                         | C7 (13) - PHE1072<br>[3.33] - (CZ)          |                                     |                                                      |  |

Atom names and their corresponding number in brackets corresponds to the numbering of HHQ atoms in Supplementary Figure 3. Numbers in the square brackets indicate the lowest interatomic distance between the given ligand atom and the amino acid residue.

**Supplementary Table 10.** Interactions of GNF-Pf-5660 with wild-type and mutated PfMDR1.

| wild-type PfMDR1 |                 |                    |                      |                    |                          | PfMDR1-290F        |                       |                   |                     |                  |                 |                    |                      |                    |                     |                   |                |                   |                    |                      |
|------------------|-----------------|--------------------|----------------------|--------------------|--------------------------|--------------------|-----------------------|-------------------|---------------------|------------------|-----------------|--------------------|----------------------|--------------------|---------------------|-------------------|----------------|-------------------|--------------------|----------------------|
| polar            |                 | hydrophobic        |                      | pi-pi              |                          | other              |                       | hydrogen bonds    |                     | polar            |                 | hydrophobic        |                      | pi-pi              |                     | halogen-bond      |                | other             |                    |                      |
| O2 (3)<br>[3.60] | TYR803<br>(OH)  | C14 (21)<br>[3.39] | ILE286<br>(CD1)      | C23 (30)<br>[3.71] | TYR290<br>(CE2, CZ)      | C26 (33)<br>[3.70] | ASN283<br>(CB, OD1)   | N1 (7)<br>[2.90]  | ASN283<br>(CG, OD1) | O1 (2)<br>[3.43] | TYR803<br>(OH)  | C17 (24)<br>[3.90] | ILE286<br>(CD1)      | C3 (10)<br>[3.67]  | TYR803<br>(CE1)     | C11 (1)<br>[3.72] | TYR803<br>(OH) | C2 (9)<br>[3.25]  | ASN283<br>(OD1)    |                      |
| O5 (6)<br>[3.60] | SER1075<br>(OG) | C24 (31)<br>[3.68] | LEU287<br>(CD2, CG)  | C22 (29)<br>[3.81] | TYR290<br>(CE2)          | O3 (4)<br>[3.36]   | ILE286<br>(CG2)       | H1 (35)<br>[3.33] | ASN283<br>(OD1)     | O2 (3)<br>[3.68] | TYR803<br>(OH)  | C14 (21)<br>[3.64] | LEU287<br>(CD2, CG)  | C4 (11)<br>[3.56]  | TYR803<br>(CE1)     |                   |                | C4 (11)<br>[3.52] | ASN283<br>(OD1)    |                      |
|                  |                 | C26 (33)<br>[3.63] | LEU287<br>(CG)       | C21 (28)<br>[3.60] | TYR810<br>(CD2, CE2, CG) | O2 (3)<br>[3.30]   | TYR803<br>(CE1, CZ)   |                   |                     | O5 (6)<br>[3.45] | TYR1076<br>(OH) | C24 (31)<br>[3.45] | PHE806<br>(CD2, CE2) | C5 (12)<br>[3.74]  | TYR803<br>(CE1, CZ) |                   |                | O3 (4)<br>[3.46]  | ILE286<br>(CG2)    |                      |
|                  |                 | C24 (31)<br>[3.59] | TYR803<br>(CE1)      | C23 (30)<br>[3.46] | TYR810<br>(CE1, CE2, CZ) | C5 (12)<br>[3.74]  | TYR803<br>(OH)        |                   |                     | O4 (5)<br>[3.35] | LYS1079<br>(NZ) | C14 (21)<br>[3.82] | PHE806<br>(CE2)      | C8 (15)<br>[3.58]  | TYR803<br>(CE1)     |                   |                | N1 (7)<br>[3.44]  | TYR803<br>(CE1)    |                      |
|                  |                 | C24 (31)<br>[3.42] | PHE806<br>(CD2, CE2) | C20 (27)<br>[3.35] | PHE1072<br>(CD1, CE1)    | C8 (15)<br>[3.74]  | TYR803<br>(OH)        |                   |                     |                  |                 | C26 (33)<br>[3.44] | ALA807<br>(CB)       | C10 (17)<br>[3.47] | TYR803<br>(CE1)     |                   |                | C3 (10)<br>[3.35] | TYR803<br>(OH)     |                      |
|                  |                 | C27 (34)<br>[3.44] | ILE1071<br>(CG2)     | C19 (26)<br>[3.37] | PHE1072<br>(CD1, CE1)    | O3 (4)<br>[3.80]   | PHE806<br>(CE2)       |                   |                     |                  |                 | C27 (34)<br>[3.51] | HIS913<br>(CD2)      | C13 (20)<br>[3.88] | TYR803<br>(CE1)     |                   |                | C5 (12)<br>[2.99] | TYR803<br>(OH)     |                      |
|                  |                 | C7 (14)<br>[3.85]  | PHE1072<br>(CZ)      | C18 (25)<br>[3.62] | PHE1072<br>(CE1)         | C23 (30)<br>[3.82] | TYR810<br>(OH)        |                   |                     |                  |                 | C27 (34)<br>[3.67] | PHE914<br>(CE1)      |                    |                     |                   |                | C7 (14)<br>[3.68] | TYR803<br>(OH)     |                      |
|                  |                 |                    |                      | C13 (20)<br>[3.66] | PHE1072<br>(CE1)         | O5 (6)<br>[3.84]   | ILE1071<br>(CG2)      |                   |                     |                  |                 |                    |                      |                    |                     |                   |                | C8 (15)<br>[3.59] | TYR803<br>(OH)     |                      |
|                  |                 |                    |                      |                    |                          | O5 (6)<br>[3.62]   | PHE1072<br>(CD1, CE1) |                   |                     |                  |                 |                    |                      |                    |                     |                   |                | O2 (3)<br>[3.81]  | PHE806<br>(CD2)    |                      |
|                  |                 |                    |                      |                    |                          | O1 (2)<br>[3.31]   | PHE1072<br>(CZ)       |                   |                     |                  |                 |                    |                      |                    |                     |                   |                |                   | C27 (34)<br>[3.35] | HIS913<br>(NE2)      |
|                  |                 |                    |                      |                    |                          | C27 (34)<br>[3.55] | SER1075<br>(CB, OG)   |                   |                     |                  |                 |                    |                      |                    |                     |                   |                |                   | O5 (6)<br>[3.87]   | LEU917<br>(CD1)      |
|                  |                 |                    |                      |                    |                          | C25 (32)<br>[3.80] | TYR1076<br>(OH)       |                   |                     |                  |                 |                    |                      |                    |                     |                   |                |                   | O5 (6)<br>[3.29]   | TYR1076<br>(CE1, CZ) |
|                  |                 |                    |                      |                    |                          | C25 (32)<br>[3.86] | LYS1079<br>(NZ)       |                   |                     |                  |                 |                    |                      |                    |                     |                   |                |                   | C20 (27)<br>[3.53] | TYR1076<br>(OH)      |
|                  |                 |                    |                      |                    |                          |                    |                       |                   |                     |                  |                 |                    |                      |                    |                     |                   |                |                   | C19 (26)<br>[3.74] | TYR1076<br>(OH)      |
|                  |                 |                    |                      |                    |                          |                    |                       |                   |                     |                  |                 |                    |                      |                    |                     |                   |                |                   | C25 (32)<br>[3.24] | LYS1079<br>(NZ)      |

  

| PfMDR1-1075I     |                |                    |                       |                    |                                   | PfMDR1-1072L       |                          |                  |                |                    |                               |                    |                          |                   |                               |                   |                |                    |                                        |
|------------------|----------------|--------------------|-----------------------|--------------------|-----------------------------------|--------------------|--------------------------|------------------|----------------|--------------------|-------------------------------|--------------------|--------------------------|-------------------|-------------------------------|-------------------|----------------|--------------------|----------------------------------------|
| polar            |                | hydrophobic        |                       | pi-pi              |                                   | other              |                          | polar            |                | hydrophobic        |                               | pi-pi              |                          | cation-pi         |                               | halogen-bond      |                | other              |                                        |
| N1 (7)<br>[3.55] | TYR803<br>(OH) | C22 (29)<br>[3.70] | ILE286<br>(CG2)       | C23 (30)<br>[3.04] | TYR290<br>(CB, CD1, CD2, CE1, CG) | C26 (33)<br>[3.05] | ASN283<br>(CB, CG, OD1)  | O1 (2)<br>[3.68] | TYR803<br>(OH) | C23 (30)<br>[3.84] | ILE286<br>(CG2)               | C16 (23)<br>[3.73] | TYR803<br>(CE1, CZ)      | H1 (35)<br>[2.47] | PHE1068<br>(CB, CD2, CE2, CG) | C11 (1)<br>[3.55] | TYR803<br>(OH) | O3 (4)<br>[3.63]   | LEU287<br>(CD2)                        |
| O3 (4)<br>[3.51] | TYR803<br>(OH) | C17 (24)<br>[3.79] | ILE286<br>(CG2)       | C22 (29)<br>[3.50] | TYR290<br>(CB, CD2, CG)           | O2 (3)<br>[3.89]   | ILE286<br>(CG2)          |                  |                | C22 (29)<br>[3.45] | ILE286<br>(CG2)               | C21 (28)<br>[3.32] | TYR803<br>(CE1, CZ)      |                   |                               |                   |                | C11 (1)<br>[3.48]  | TYR803<br>(CE1, CZ)                    |
|                  |                | C26 (33)<br>[3.83] | ILE286<br>(CD1)       | C8 (15)<br>[3.89]  | TYR803<br>(CZ)                    | O2 (3)<br>[3.82]   | LEU287<br>(CD2)          |                  |                | C24 (31)<br>[3.87] | TYR290<br>(CE2)               | C4 (11)<br>[3.61]  | PHE1068<br>(CB, CD2, CG) |                   |                               |                   |                | C3 (10)<br>[3.77]  | TYR803<br>(OH)                         |
|                  |                | C24 (31)<br>[3.46] | LEU287<br>(CD2, CG)   | C21 (28)<br>[3.04] | TYR810<br>(CD1, CD2, CE1, CG, CZ) | O3 (4)<br>[3.04]   | TYR803<br>(CD1, CE1, CZ) |                  |                | C26 (33)<br>[3.87] | TYR290<br>(CE2)               | C10 (17)<br>[3.61] | PHE1068<br>(CD2)         |                   |                               |                   |                | C6 (13)<br>[3.03]  | TYR803<br>(OH)                         |
|                  |                | C14 (21)<br>[3.52] | TYR803<br>(CE1)       | C23 (30)<br>[3.28] | TYR810<br>(CD1, CE1, CZ)          | C5 (12)<br>[3.86]  | TYR803<br>(OH)           |                  |                | C14 (21)<br>[3.89] | ALA807<br>(CB)                | C9 (16)<br>[3.63]  | PHE1068<br>(CD1)         |                   |                               |                   |                | C7 (14)<br>[3.25]  | TYR803<br>(OH)                         |
|                  |                | C15 (22)<br>[3.46] | TYR803<br>(CE1, CZ)   | C18 (25)<br>[3.57] | PHE1072<br>(CE1)                  | C8 (15)<br>[3.18]  | TYR803<br>(OH)           |                  |                | C14 (21)<br>[3.15] | TYR810<br>(CB, CD2, CG)       | C12 (19)<br>[3.33] | PHE1068<br>(CD1, CE1)    |                   |                               |                   |                | C11 (18)<br>[3.83] | TYR803<br>(OH)                         |
|                  |                | C24 (31)<br>[3.56] | PHE806<br>(CD2, CE2)  |                    |                                   | C10 (17)<br>[3.06] | TYR803<br>(OH)           |                  |                | C15 (22)<br>[3.68] | TYR810<br>(CD1, CD2, CG)      | C18 (25)<br>[3.46] | PHE1068<br>(CD1, CE1)    |                   |                               |                   |                | C16 (23)<br>[3.38] | TYR803<br>(OH)                         |
|                  |                | C27 (34)<br>[3.37] | ILE1071<br>(CD1, CG2) |                    |                                   | C14 (21)<br>[3.38] | TYR803<br>(OH)           |                  |                | C2 (9)<br>[2.89]   | PHE1068<br>(CB, CD1, CD2, CG) |                    |                          |                   |                               |                   |                | C21 (28)<br>[3.68] | TYR803<br>(OH)                         |
|                  |                |                    |                       |                    |                                   | C15 (22)<br>[3.62] | TYR803<br>(OH)           |                  |                | C14 (21)<br>[3.59] | PHE1068<br>(CD2)              |                    |                          |                   |                               |                   |                | C11 (1)<br>[3.66]  | PHE806<br>(CD2)                        |
|                  |                |                    |                       |                    |                                   | O3 (4)<br>[3.32]   | PHE806<br>(CD2, CE2)     |                  |                | C25 (32)<br>[3.67] | PHE1068<br>(CE1)              |                    |                          |                   |                               |                   |                | O3 (4)<br>[3.29]   | PHE806<br>(CD2, CE2)                   |
|                  |                |                    |                       |                    |                                   | O2 (3)<br>[3.67]   | PHE806<br>(CE2)          |                  |                | C19 (26)<br>[3.49] | ILE1071<br>(CB, CD1, CG2)     |                    |                          |                   |                               |                   |                | H1 (35)<br>[3.48]  | ALA807<br>(CB)                         |
|                  |                |                    |                       |                    |                                   | O5 (6)<br>[3.29]   | ILE1071<br>(CG2)         |                  |                | C13 (20)<br>[3.80] | ILE1071<br>(CG2)              |                    |                          |                   |                               |                   |                | O3 (4)<br>[3.55]   | TYR810<br>(CB, CD1, CG)                |
|                  |                |                    |                       |                    |                                   | O4 (5)<br>[3.40]   | PHE1072<br>(CE1)         |                  |                | C27 (34)<br>[3.66] | ILE1071<br>(CD1)              |                    |                          |                   |                               |                   |                | O2 (3)<br>[3.35]   | TYR810<br>(CD1, CD2, CE1, CE2, CG, CZ) |
|                  |                |                    |                       |                    |                                   |                    |                          |                  |                | C1 (8)<br>[3.22]   | LEU1072<br>(CD1, CD2, CG)     |                    |                          |                   |                               |                   |                | N1 (7)<br>[3.00]   | PHE1068<br>(CB, CD2, CE2, CG)          |
|                  |                |                    |                       |                    |                                   |                    |                          |                  |                | C2 (9)<br>[3.62]   | LEU1072<br>(CD1, CG)          |                    |                          |                   |                               |                   |                | O4 (5)<br>[3.49]   | PHE1068<br>(CE1)                       |
|                  |                |                    |                       |                    |                                   |                    |                          |                  |                | G6 (13)<br>[3.30]  | LEU1072<br>(CD2)              |                    |                          |                   |                               |                   |                |                    |                                        |

Atom names and their corresponding number in brackets corresponds to the numbering of HHQ atoms in Supplementary Figure 3. Numbers in the square brackets indicate the lowest interatomic distance between the given ligand atom and the amino acid residue.

**Supplementary Table 11.** Interactions of GNF-Pf-5668 with wild-type and mutated PfMDR1.

| wild-type PfMDR1 |                |                    |                        |                    |                       |                    |                   |
|------------------|----------------|--------------------|------------------------|--------------------|-----------------------|--------------------|-------------------|
| hydrogen bonds   |                | hydrophobic        |                        | pi-pi              |                       | other              |                   |
| O3 (4)<br>[3.38] | TYR803<br>(OH) | C28 (35)<br>[3.27] | ILE286 (CB, CD1, CG2)  | C22 (29)<br>[3.77] | TYR290 (CG)           | O2 (3)<br>[3.89]   | ILE286 (CG2)      |
|                  |                | C25 (32)<br>[3.45] | LEU287 (CD2, CG)       | C21 (28)<br>[3.26] | PHE806 (CD2, CE2)     | C15 (22)<br>[3.65] | TYR803 (OH)       |
|                  |                | C28 (35)<br>[3.76] | LEU287 (CG)            | C23 (30)<br>[3.47] | PHE806 (CE2)          | C24 (31)<br>[3.69] | TYR803 (OH)       |
|                  |                | C21 (28)<br>[3.71] | LEU287 (CD2)           | C21 (28)<br>[3.84] | TYR810 (CB, CG)       | O1 (2)<br>[3.65]   | PHE1068 (CD2, CG) |
|                  |                | C23 (30)<br>[3.67] | LEU287 (CD2)           | C23 (30)<br>[3.23] | TYR810 (CD1, CE1, CG) | O5 (6)<br>[3.47]   | ILE1071 (CG2)     |
|                  |                | C24 (31)<br>[3.25] | TYR803 (CE1, CZ)       | C12 (19)<br>[3.38] | PHE1068 (CD1, CE1)    | O4 (5)<br>[3.73]   | ILE1071 (CD1)     |
|                  |                | C25 (32)<br>[3.31] | PHE806 (CD2, CE2)      | C9 (16)<br>[3.80]  | PHE1068 (CE1)         | O1 (2)<br>[3.62]   | PHE1072 (CZ)      |
|                  |                | C6 (13)<br>[3.22]  | PHE1068 (CE1, CE2, CZ) |                    |                       |                    |                   |
|                  |                | C26 (33)<br>[3.82] | PHE1068 (CE1)          |                    |                       |                    |                   |
|                  |                | C27 (34)<br>[3.42] | ILE1071 (CG2)          |                    |                       |                    |                   |
|                  |                | C26 (33)<br>[3.37] | ILE1071 (CD1)          |                    |                       |                    |                   |

| PfMDR1-1072L       |                        |                    |                    |                   |                       |                    |                            |
|--------------------|------------------------|--------------------|--------------------|-------------------|-----------------------|--------------------|----------------------------|
| hydrophobic        |                        | pi-pi              |                    | cation-pi         |                       | other              |                            |
| C21 (28)<br>[3.27] | ILE286 (CD1, CG2)      | C22 (29)<br>[3.24] | TYR803 (CE1, CZ)   | H1 (36)<br>[3.33] | PHE1068 (CB, CD2, CG) | O3 (4)<br>[3.80]   | LEU287 (CD2)               |
| C23 (30)<br>[3.85] | ILE286 (CG2)           | C17 (24)<br>[3.64] | TYR803 (CE1, CZ)   |                   |                       | C1 (8)<br>[3.77]   | TYR803 (OH)                |
| C24 (31)<br>[3.56] | TYR290 (CD2, CE2, CZ)  | C9 (16)<br>[3.77]  | PHE1068 (CD1)      |                   |                       | C2 (9)<br>[3.81]   | TYR803 (OH)                |
| C14 (21)<br>[3.64] | ALA807 (CB)            | C12 (19)<br>[3.82] | PHE1068 (CD1)      |                   |                       | C3 (10)<br>[3.51]  | TYR803 (OH)                |
| C14 (21)<br>[3.31] | TYR810 (CB, CD2, CG)   | C18 (25)<br>[3.57] | PHE1068 (CD1, CE1) |                   |                       | C4 (11)<br>[3.75]  | TYR803 (OH)                |
| C15 (22)<br>[3.87] | TYR810 (CD1, CG)       | C20 (27)<br>[3.57] | PHE1068 (CD1, CE1) |                   |                       | C6 (13)<br>[2.96]  | TYR803 (OH)                |
| C2 (9)<br>[3.56]   | PHE1068 (CB, CG)       | C19 (26)<br>[3.46] | PHE1068 (CD1)      |                   |                       | C7 (14)<br>[3.28]  | TYR803 (OH)                |
| C27 (34)<br>[3.33] | PHE1068 (CD1, CE1)     | C13 (20)<br>[3.57] | PHE1068 (CD1)      |                   |                       | C11 (18)<br>[3.85] | TYR803 (OH)                |
| C28 (35)<br>[3.90] | PHE1068 (CE2)          |                    |                    |                   |                       | C22 (29)<br>[3.76] | TYR803 (OH)                |
| C19 (26)<br>[3.40] | ILE1071 (CB, CD1, CG2) |                    |                    |                   |                       | C17 (24)<br>[3.40] | TYR803 (OH)                |
| C27 (34)<br>[3.64] | ILE1071 (CD1)          |                    |                    |                   |                       | O3 (4)<br>[3.58]   | PHE806 (CE2)               |
| C1 (8)<br>[3.20]   | LEU1072 (CD2, CG)      |                    |                    |                   |                       | N1 (7)<br>[3.79]   | ALA807 (CB)                |
| C2 (9)<br>[3.45]   | LEU1072 (CD1, CD2, CG) |                    |                    |                   |                       | H1 (36)<br>[3.13]  | ALA807 (CB)                |
| C6 (13)<br>[3.68]  | LEU1072 (CD2)          |                    |                    |                   |                       | O3 (4)<br>[3.39]   | TYR810 (CD1, CE1, CG)      |
|                    |                        |                    |                    |                   |                       | O2 (3)<br>[3.50]   | TYR810 (CD2, CE1, CE2, CZ) |
|                    |                        |                    |                    |                   |                       | N1 (7)<br>[3.83]   | PHE1068 (CD2)              |
|                    |                        |                    |                    |                   |                       | O4 (5)<br>[3.90]   | PHE1068 (CE1)              |
|                    |                        |                    |                    |                   |                       | O5 (6)<br>[3.86]   | ILE1071 (CD1)              |

| PfMDR1-290F       |              |                  |              |                    |                      |                    |                   |                    |                        |
|-------------------|--------------|------------------|--------------|--------------------|----------------------|--------------------|-------------------|--------------------|------------------------|
| hydrogen bonds    |              | polar            |              | hydrophobic        |                      | pi-pi              |                   | other              |                        |
| N1 (7)<br>[3.15]  | ASN283 (OD1) | O2 (3)<br>[3.85] | TYR803 (OH)  | C14 (21)<br>[3.69] | ILE286 (CB, CG2)     | C19 (26)<br>[3.75] | TYR1076 (CE1, CZ) | C26 (33)<br>[3.72] | ASN283 (ND2)           |
| O1 (2)<br>[2.94]  | TYR803 (OH)  | O4 (5)<br>[3.77] | HIS913 (NE2) | C10 (17)<br>[3.87] | ILE286 (CD1)         |                    |                   | C2 (9)<br>[3.49]   | ASN283 (OD1)           |
| H1 (36)<br>[3.64] | ASN283 (OD1) | O5 (6)<br>[3.62] | HIS913 (NE2) | C14 (21)<br>[3.67] | LEU287 (CG)          |                    |                   | C4 (11)<br>[3.80]  | ASN283 (OD1)           |
| H1 (36)<br>[3.55] | ILE286 (OD1) | O5 (6)<br>[3.25] | TYR1076 (OH) | C26 (33)<br>[3.38] | TYR803 (CB, CD1, CG) |                    |                   | F1 (1)<br>[2.68]   | ILE286 (CD1, CG1, CG2) |
|                   |              |                  |              | C3 (10)<br>[3.76]  | TYR803 (CE1)         |                    |                   | O3 (4)<br>[3.84]   | ILE286 (CG2)           |
|                   |              |                  |              | C4 (11)<br>[3.83]  | TYR803 (CE1)         |                    |                   | N1 (7)<br>[3.58]   | ILE286 (CD1)           |
|                   |              |                  |              | C8 (15)<br>[3.86]  | TYR803 (CE1)         |                    |                   | O3 (4)<br>[3.87]   | LEU287 (CD2)           |
|                   |              |                  |              | C24 (31)<br>[3.39] | TYR803 (CE1, CZ)     |                    |                   | O2 (3)<br>[3.70]   | TYR803 (CE1)           |
|                   |              |                  |              | C15 (22)<br>[3.78] | PHE806 (CE2)         |                    |                   | C3 (10)<br>[3.29]  | TYR803 (OH)            |
|                   |              |                  |              | C27 (34)<br>[3.46] | HIS913 (CD2)         |                    |                   | C5 (12)<br>[3.13]  | TYR803 (OH)            |
|                   |              |                  |              | C27 (34)<br>[3.80] | LEU917 (CD1)         |                    |                   | C7 (14)<br>[3.32]  | TYR803 (OH)            |
|                   |              |                  |              | C28 (35)<br>[3.64] | PHE1072 (CE2, CZ)    |                    |                   | C8 (15)<br>[3.85]  | TYR803 (OH)            |
|                   |              |                  |              |                    |                      |                    |                   | C24 (31)<br>[3.16] | TYR803 (OH)            |
|                   |              |                  |              |                    |                      |                    |                   | O2 (3)<br>[3.28]   | PHE806 (CD2, CE2)      |
|                   |              |                  |              |                    |                      |                    |                   | O3 (4)<br>[3.68]   | PHE806 (CE2)           |
|                   |              |                  |              |                    |                      |                    |                   | C27 (34)<br>[3.46] | HIS913 (NE2)           |
|                   |              |                  |              |                    |                      |                    |                   | O5 (6)<br>[3.47]   | LEU917 (CD1)           |
|                   |              |                  |              |                    |                      |                    |                   | O5 (6)<br>[3.45]   | TYR1076 (CE1, CZ)      |
|                   |              |                  |              |                    |                      |                    |                   | C20 (27)<br>[3.33] | TYR1076 (OH)           |
|                   |              |                  |              |                    |                      |                    |                   | C19 (26)<br>[3.17] | TYR1076 (OH)           |

| PfMDR1-1075I     |             |                    |                                  |                    |                      |                  |             |                    |                      |
|------------------|-------------|--------------------|----------------------------------|--------------------|----------------------|------------------|-------------|--------------------|----------------------|
| hydrogen bonds   |             | hydrophobic        |                                  | pi-pi              |                      | halogen-bond     |             | other              |                      |
| O3 (4)<br>[3.13] | TYR803 (OH) | C28 (35)<br>[3.47] | LEU287 (CD1, CG)                 | C21 (28)<br>[3.43] | PHE806 (CD2, CE2)    | F1 (1)<br>[3.72] | TYR803 (OH) | C28 (35)<br>[3.33] | ASN283 (CB, CG, OD1) |
|                  |             | C23 (30)<br>[3.59] | LEU287 (CD2)                     | C23 (30)<br>[3.24] | PHE806 (CD2, CE2)    |                  |             | C25 (32)<br>[3.80] | ASN283 (OD1)         |
|                  |             | C6 (13)<br>[3.02]  | PHE1068 (CD1, CD2, CE1, CE2, CG) | C21 (28)<br>[3.84] | TYR810 (CB)          |                  |             | O2 (3)<br>[3.46]   | ILE286 (CG2)         |
|                  |             | C1 (8)<br>[3.83]   | PHE1068 (CE1, CZ)                | C23 (30)<br>[3.30] | TYR810 (CB, CD1, CG) |                  |             | C15 (22)<br>[3.76] | TYR803 (OH)          |
|                  |             | C27 (34)<br>[3.44] | ILE1071 (CD1)                    | C22 (29)<br>[3.67] | TYR810 (CD1, CE1)    |                  |             | O1 (2)<br>[3.61]   | PHE1068 (CD2, CG)    |
|                  |             | C26 (33)<br>[3.68] | PHE1072 (CE1)                    | C9 (16)<br>[3.79]  | PHE1068 (CE1)        |                  |             | O1 (2)<br>[3.37]   | PHE1072 (CE2, CZ)    |
|                  |             |                    |                                  |                    |                      |                  |             | F1 (1)<br>[3.86]   | PHE1072 (CE2)        |
|                  |             |                    |                                  |                    |                      |                  |             | O4 (5)<br>[3.37]   | PHE1072 (CE1)        |

Atom names and their corresponding number in brackets corresponds to the numbering of HHQ atoms in Supplementary Figure 3. Numbers in the square brackets indicate the lowest interatomic distance between the given ligand atom and the amino acid residue.





**Supplementary Table 13a.** IC<sub>50</sub> data for common and experimental antimalarials for the edited F1072L and S1075I lines and the selected Y290F and F1072L + CNV lines in the Dd2-B2 background.

| Antimalarial             | Dd2-B2                |      |    | Dd2-B2 F1072L edited  |       |   |                      | Dd2-B2 S1075I edited |                       |      |   | Dd2-B2 Y290F selected (5660-2B6H1) |                   |                       |      | Dd2-B2 F1072L + CNV selected (5668-3C4D2) |                      |                   |                       |      |      |                      |                   |
|--------------------------|-----------------------|------|----|-----------------------|-------|---|----------------------|----------------------|-----------------------|------|---|------------------------------------|-------------------|-----------------------|------|-------------------------------------------|----------------------|-------------------|-----------------------|------|------|----------------------|-------------------|
|                          | Mean IC <sub>50</sub> | SEM  | n  | Mean IC <sub>50</sub> | SEM   | n | Fold shift vs Dd2-B2 | P-value vs Dd2-B2    | Mean IC <sub>50</sub> | SEM  | n | Fold shift vs Dd2-B2               | P-value vs Dd2-B2 | Mean IC <sub>50</sub> | SEM  | n                                         | Fold shift vs Dd2-B2 | P-value vs Dd2-B2 | Mean IC <sub>50</sub> | SEM  | n    | Fold shift vs Dd2-B2 | P-value vs Dd2-B2 |
| Chloroquine              | 327.5                 | 28.4 | 5  | 394.8                 | 27.8  | 5 | 1.2                  | 0.4762               | 397.2                 | 32.7 | 5 | 1.2                                | 0.4352            | 299.1                 | 46.5 | 5                                         | 0.9                  | >0.9999           | n.d.                  | n.d. | n.d. | n.d.                 | n.d.              |
| Dihydroartemisin         | 1.9                   | 0.1  | 7  | 1.1                   | 0.1   | 5 | 0.6                  | 9.57E-05             | 1.2                   | 0.1  | 4 | 0.6                                | 0.0015            | 1.1                   | 0.2  | 3                                         | 0.6                  | 0.0020            | 1.4                   | 0.1  | 3    | 0.7                  | 0.0306            |
| Quinine                  | 185.5                 | 6.6  | 9  | 52.0                  | 2.5   | 5 | 0.3                  | 2.22E-08             | 36.2                  | 2.1  | 5 | 0.2                                | 5.82E-09          | 49.6                  | 3.1  | 4                                         | 0.3                  | 1.79E-07          | 109.6                 | 6.1  | 4    | 0.6                  | 9.0E-05           |
| Lumefantrine             | 1.9                   | 0.2  | 10 | 0.6                   | 0.1   | 5 | 0.3                  | 0.0003               | 2.3                   | 0.1  | 4 | 1.2                                | >0.9999           | 1.0                   | 0.1  | 5                                         | 0.5                  | 0.0073            | 1.4                   | 0.1  | 4    | 0.7                  | 0.2438            |
| Monodesethyl-Amodiaquine | 43.9                  | 4.3  | 5  | 60.1                  | 5.1   | 5 | 1.4                  | 0.0658               | 53.0                  | 4.2  | 5 | 1.2                                | 0.5455            | 46.1                  | 6.7  | 4                                         | 1.0                  | >0.9999           | n.d.                  | n.d. | n.d. | n.d.                 | n.d.              |
| Ferroquine               | 10.8                  | 0.9  | 6  | 12.9                  | 1.4   | 5 | 1.2                  | 0.4130               | 11.8                  | 0.9  | 5 | 1.1                                | >0.9999           | 10.8                  | 1.2  | 4                                         | 1.0                  | >0.9999           | n.d.                  | n.d. | n.d. | n.d.                 | n.d.              |
| Mefloquine               | 17.0                  | 0.9  | 12 | 4.7                   | 0.3   | 6 | 0.3                  | 1.61E-07             | 12.4                  | 0.8  | 5 | 0.7                                | 0.0258            | 8.5                   | 0.2  | 4                                         | 0.5                  | 0.000297          | 12.1                  | 0.1  | 4    | 0.7                  | 0.0253            |
| ACT-451840               | 0.7                   | 0.0  | 10 | 11.1                  | 0.8   | 4 | 16.1                 | 1.06E-10             | 3.8                   | 0.1  | 5 | 5.5                                | 3.1E-13           | 31.0                  | 4.4  | 3                                         | 45.0                 | 8.2E-08           | 10.8                  | 0.9  | 3    | 15.7                 | 4.2E-10           |
| Piperaquine              | 12.0                  | 1.0  | 11 | 16.4                  | 1.1   | 6 | 1.4                  | 0.0525               | 14.9                  | 0.8  | 5 | 1.2                                | 0.3319            | 14.6                  | 0.9  | 5                                         | 1.2                  | 0.5453            | 9.4                   | 1.0  | 4    | 0.8                  | 0.6849            |
| Monodesethyl-Chloroquine | 651.0                 | 89.5 | 4  | 711.4                 | 101.9 | 4 | 1.1                  | >0.9999              | 758.1                 | 93.8 | 4 | 1.2                                | >0.9999           | 593.0                 | 51.3 | 4                                         | 0.9                  | 0.9435            | n.d.                  | n.d. | n.d. | n.d.                 | n.d.              |

SEM: standard error of the mean; n: number of repeated experiments; P value vs Dd2-B2: Welch's t-test corrected for multiple comparisons using the Bonferroni-Dunn method; n.d.: not done. All values are given in nM.

**Supplementary Table 13b.** IC<sub>50</sub> data for the NF54 and selected NF54 Y290F lines.

| Antimalarial     | NF54                  |     |   | NF54 Y290F selected   |     |   |                    |                 |
|------------------|-----------------------|-----|---|-----------------------|-----|---|--------------------|-----------------|
|                  | Mean IC <sub>50</sub> | SEM | n | Mean IC <sub>50</sub> | SEM | n | Fold shift vs NF54 | P value vs NF54 |
| Dihydroartemisin | 1.4                   | 0.1 | 5 | 1.5                   | 0.2 | 4 | 1.1                | 0.7455          |
| Quinine          | 35.1                  | 1.6 | 5 | 18.7                  | 1.6 | 4 | 0.5                | 0.0002          |
| Lumefantrine     | 2.9                   | 0.2 | 4 | 3.4                   | 0.3 | 4 | 1.2                | 0.2005          |
| Mefloquine       | 17.7                  | 0.4 | 5 | 17.5                  | 1.2 | 4 | 1.0                | 0.8843          |
| ACT-451840       | 0.5                   | 0.0 | 4 | 74.3                  | 4.9 | 4 | 165.1              | 0.0006          |
| Piperaquine      | 7.6                   | 0.7 | 5 | 9.3                   | 0.9 | 4 | 1.2                | 0.1821          |

SEM: standard error of the mean; n: number of repeated experiments; P value vs Dd2-B2: Welch's t-test. All values are given in nM.

**Supplementary Table 13c.** IC<sub>50</sub> data for the FCB and KD1<sup>mdr1</sup> lines.

| Antimalarial | FCB                   |     |   | KD1 <sup>mdr1</sup>   |     |   |                   |                |
|--------------|-----------------------|-----|---|-----------------------|-----|---|-------------------|----------------|
|              | Mean IC <sub>50</sub> | SEM | n | Mean IC <sub>50</sub> | SEM | n | Fold shift vs FCB | P value vs FCB |
| Lumefantrine | 1.3                   | 0.1 | 4 | 0.9                   | 0.1 | 5 | 0.7               | 0.0383         |
| Mefloquine   | 10.7                  | 0.5 | 5 | 8.9                   | 0.7 | 5 | 0.8               | 0.0720         |
| Piperaquine  | 10.4                  | 0.4 | 4 | 11.5                  | 1.4 | 4 | 1.1               | 0.4706         |

SEM: standard error of the mean; n: number of repeated experiments; P value vs Dd2-B2: Welch's t-test. All values are given in nM.

**Supplementary Table 14a.** IC<sub>90</sub> data for common and experimental antimalarials for the edited F1072L and S1075I lines and the selected Y290F and F1072L + CNV lines in the Dd2-B2 background.

| Antimalarial             | Dd2-B2                |       |    | Dd2-B2 F1072L edited  |       |   |                      | Dd2-B2 S1075I edited |                       |       |   | Dd2-B2 Y290F selected (5660-2B6H1) |                   |                       |      | Dd2-B2 F1072L + CNV selected (5668-3C4D2) |                      |                   |                       |      |      |                      |                   |
|--------------------------|-----------------------|-------|----|-----------------------|-------|---|----------------------|----------------------|-----------------------|-------|---|------------------------------------|-------------------|-----------------------|------|-------------------------------------------|----------------------|-------------------|-----------------------|------|------|----------------------|-------------------|
|                          | Mean IC <sub>90</sub> | SEM   | n  | Mean IC <sub>90</sub> | SEM   | n | Fold shift vs Dd2-B2 | P value vs Dd2-B2    | Mean IC <sub>90</sub> | SEM   | n | Fold shift vs Dd2-B2               | P value vs Dd2-B2 | Mean IC <sub>90</sub> | SEM  | n                                         | Fold shift vs Dd2-B2 | P value vs Dd2-B2 | Mean IC <sub>50</sub> | SEM  | n    | Fold shift vs Dd2-B2 | P value vs Dd2-B2 |
| Chloroquine              | 492.4                 | 49.8  | 5  | 700.0                 | 86.8  | 5 | 1.4                  | 0.0783               | 606.2                 | 53.6  | 5 | 1.2                                | 0.6183            | 493.3                 | 71.8 | 5                                         | 1.0                  | >0.9999           | n.d.                  | n.d. | n.d. | n.d.                 | n.d.              |
| Dihydroartemisin         | 3.7                   | 0.1   | 7  | 2.6                   | 0.1   | 5 | 0.7                  | 0.0004               | 2.9                   | 0.4   | 4 | 0.8                                | 0.1585            | 2.3                   | 0.1  | 3                                         | 0.7                  | 0.0009            | 2.7                   | 0.3  | 3    | 0.7                  | 0.0249            |
| Quinine                  | 411.4                 | 17.5  | 9  | 123.4                 | 10.1  | 5 | 0.3                  | 3.061E-07            | 79.0                  | 5.1   | 5 | 0.2                                | 4.251E-08         | 118.9                 | 11.2 | 4                                         | 0.3                  | 1.797E-06         | 235.7                 | 7.9  | 4    | 0.6                  | 0.0002            |
| Lumefantrine             | 5.6                   | 0.9   | 10 | 2.5                   | 0.2   | 5 | 0.3                  | 0.1015               | 9.6                   | 1.4   | 4 | 1.4                                | 0.1173765         | 6.7                   | 0.7  | 5                                         | 0.9                  | >0.9999           | 3.9                   | 0.5  | 4    | 0.7                  | 0.9813            |
| Monodesethyl-Amodiaquine | 58.2                  | 5.9   | 5  | 89.0                  | 8.7   | 5 | 1.5                  | 0.0134               | 67.4                  | 7.0   | 5 | 1.2                                | >0.9999           | 60.9                  | 8.7  | 4                                         | 1.0                  | >0.9999           | n.d.                  | n.d. | n.d. | n.d.                 | n.d.              |
| Ferroquine               | 13.2                  | 1.3   | 6  | 16.9                  | 1.5   | 5 | 1.3                  | 0.1470               | 14.5                  | 1.1   | 5 | 1.1                                | >0.9999           | 14.1                  | 0.7  | 4                                         | 1.1                  | >0.9999           | n.d.                  | n.d. | n.d. | n.d.                 | n.d.              |
| Mefloquine               | 39.8                  | 1.5   | 12 | 11.2                  | 0.7   | 6 | 0.3                  | 0.0448               | 34.2                  | 2.8   | 5 | 0.9                                | 0.3025034         | 22.5                  | 1.0  | 4                                         | 0.6                  | 6.908E-05         | 25.7                  | 1.2  | 4    | 0.6                  | 0.0006            |
| ACT-451840               | 1.1                   | 0.1   | 10 | 42.9                  | 2.1   | 4 | 37.1                 | 1.135E-12            | 13.3                  | 1.0   | 5 | 11.5                               | 5.647E-10         | 134.5                 | 30.6 | 3                                         | 116.4                | 8.691E-06         | 41.7                  | 9.8  | 3    | 38.1                 | 1.429E-05         |
| Piperaquine              | 19.4                  | 2.1   | 11 | 28.8                  | 1.7   | 6 | 1.3                  | 0.0349               | 25.3                  | 1.6   | 6 | 1.1                                | 0.2916            | 25.8                  | 1.8  | 4                                         | 1.1                  | 0.3552            | 15.1                  | 2.0  | 4    | 0.8                  | >0.9999           |
| Monodesethyl-Chloroquine | 1007.3                | 103.7 | 4  | 1270.8                | 146.3 | 4 | 1.3                  | 0.3953               | 1229.4                | 153.0 | 4 | 1.2                                | 0.5995            | 1098.4                | 80.4 | 4                                         | 1.1                  | >0.9999           | n.d.                  | n.d. | n.d. | n.d.                 | n.d.              |

SEM: standard error of the mean; n: number of repeated experiments; P value vs Dd2-B2: Welch's t-test corrected for multiple comparisons using the Bonferroni-Dunn method; n.d.: not done. All values are given in nM.

**Supplementary Table 14b.** IC<sub>90</sub> data for the NF54 and selected NF54 Y290F lines.

| Antimalarial     | NF54                  |     |   | NF54 Y290F selected   |      |   |                    |                   |
|------------------|-----------------------|-----|---|-----------------------|------|---|--------------------|-------------------|
|                  | Mean IC <sub>90</sub> | SEM | n | Mean IC <sub>90</sub> | SEM  | n | Fold shift vs NF54 | P value vs Dd2-B2 |
| Dihydroartemisin | 3.2                   | 0.3 | 5 | 3.8                   | 0.7  | 4 | 1.2                | 0.4436            |
| Quinine          | 55.2                  | 2.5 | 5 | 29.7                  | 2.9  | 4 | 0.5                | 0.0004            |
| Lumefantrine     | 7.5                   | 0.7 | 4 | 11.5                  | 2.9  | 4 | 1.5                | 0.2570            |
| Mefloquine       | 29.7                  | 1.6 | 5 | 28.7                  | 0.7  | 4 | 1.0                | 0.5979            |
| ACT-451840       | 0.6                   | 0.1 | 4 | 163.9                 | 13.3 | 4 | 253.7              | 0.0012            |
| Piperaquine      | 9.9                   | 1.6 | 5 | 13.0                  | 1.4  | 4 | 1.3                | 0.1877            |

SEM: standard error of the mean; n: number of repeated experiments; P value vs Dd2-B2: Welch's t-test. All values are given in nM.

**Supplementary Table 14c.** IC<sub>90</sub> data for the FCB and KD1<sup>mdr1</sup> lines.

| Antimalarial | FCB                   |     |   | KD1 <sup>mdr1</sup>   |     |   |                   |                   |
|--------------|-----------------------|-----|---|-----------------------|-----|---|-------------------|-------------------|
|              | Mean IC <sub>90</sub> | SEM | n | Mean IC <sub>90</sub> | SEM | n | Fold shift vs FCB | P value vs Dd2-B2 |
| Lumefantrine | 11.0                  | 3.7 | 4 | 3.0                   | 3.0 | 5 | 0.3               | 0.1200            |
| Mefloquine   | 29.9                  | 3.2 | 5 | 21.4                  | 1.6 | 5 | 0.7               | 0.0568            |
| Piperaquine  | 17.0                  | 1.0 | 4 | 20.6                  | 2.9 | 4 | 1.2               | 0.3125            |

SEM: standard error of the mean; n: number of repeated experiments; P value vs Dd2-B2: Welch's t-test. All values are given in nM.

**Supplementary Table 15.** Heme fractionation data.

|                 | drug                   | Dd2-B2      |      |     |         |         |      |        |         |       |       |     |        | PfMDR1 <sup>seIV290F</sup> |      |     |        |         |      |     |         |         |      |     |         |
|-----------------|------------------------|-------------|------|-----|---------|---------|------|--------|---------|-------|-------|-----|--------|----------------------------|------|-----|--------|---------|------|-----|---------|---------|------|-----|---------|
|                 |                        | GNF-Pf-5660 |      |     |         | MQ      |      |        |         | LMF   |       |     |        | GNF-Pf-5660                |      |     |        | MQ      |      |     |         | LMF     |      |     |         |
|                 |                        | pressure    | Mean | SEM | n       | P value | Mean | SEM    | P value | n     | Mean  | SEM | n      | P value                    | Mean | SEM | n      | P value | Mean | SEM | n       | P value | Mean | SEM | n       |
| Hemoglobin      | 0.00x IC <sub>50</sub> | 1.74        | 0.23 | 7   | -       | 2.10    | 0.82 | -      | 4       | 2.10  | 0.82  | 4   | -      | 4.26                       | 0.16 | 6   | -      | 2.41    | 0.08 | 5   | -       | 1.42    | 0.12 | 8   | -       |
|                 | 0.10x IC <sub>50</sub> | 1.55        | 0.25 | 7   | 0.5896  | 1.36    | 0.15 | 0.3009 | 6       | 1.27  | 0.25  | 4   | 0.3711 | 3.28                       | 0.43 | 6   | 0.0573 | 2.63    | 0.64 | 6   | 0.7670  | 1.95    | 0.46 | 7   | 0.2585  |
|                 | 0.25x IC <sub>50</sub> | 1.57        | 0.23 | 7   | 0.6245  | 1.21    | 0.12 | 0.2651 | 5       | 2.02  | 0.76  | 4   | 0.9436 | 2.75                       | 0.25 | 6   | 0.0005 | 3.89    | 0.93 | 7   | 0.2172  | 1.73    | 0.17 | 6   | 0.1488  |
|                 | 0.50x IC <sub>50</sub> | 1.67        | 0.25 | 7   | 0.8505  | 1.80    | 0.15 | 0.6689 | 6       | 2.52  | 0.64  | 8   | 0.7097 | 3.59                       | 0.72 | 6   | 0.3821 | 2.63    | 0.85 | 7   | 0.8315  | 1.88    | 0.24 | 6   | 0.0861  |
|                 | 1.00x IC <sub>50</sub> | 1.29        | 0.23 | 7   | 0.1971  | 2.12    | 0.22 | 0.9802 | 6       | 2.80  | 0.59  | 8   | 0.5093 | 3.09                       | 0.59 | 6   | 0.0855 | 2.39    | 0.29 | 6   | 0.9648  | 2.97    | 0.62 | 8   | 0.0280  |
|                 | 2.00x IC <sub>50</sub> | 2.64        | 1.09 | 7   | 0.4316  | 2.25    | 0.45 | 0.8680 | 5       | 2.96  | 0.55  | 8   | 0.3940 | 2.71                       | 0.57 | 5   | 0.0190 | 2.42    | 0.48 | 8   | 0.9834  | 2.40    | 0.40 | 8   | 0.0362  |
| Heme            | 0.00x IC <sub>50</sub> | 4.84        | 0.22 | 7   | -       | 4.90    | 0.83 | -      | 4       | 4.90  | 0.83  | 4   | -      | 4.87                       | 0.63 | 6   | -      | 6.84    | 0.58 | 5   | -       | 4.92    | 0.37 | 8   | -       |
|                 | 0.10x IC <sub>50</sub> | 4.14        | 0.37 | 7   | 0.1296  | 3.70    | 0.42 | 0.1901 | 6       | 5.06  | 0.44  | 4   | 0.8703 | 4.71                       | 0.44 | 6   | 0.8391 | 5.57    | 0.62 | 6   | 0.1718  | 5.36    | 0.29 | 7   | 0.3754  |
|                 | 0.25x IC <sub>50</sub> | 4.24        | 0.70 | 6   | 0.3972  | 3.81    | 0.40 | 0.2206 | 6       | 5.49  | 0.64  | 4   | 0.5915 | 4.86                       | 0.52 | 6   | 0.9905 | 8.00    | 0.68 | 7   | 0.2516  | 6.27    | 0.27 | 6   | 0.0166  |
|                 | 0.50x IC <sub>50</sub> | 3.88        | 0.45 | 7   | 0.0766  | 3.84    | 0.32 | 0.2345 | 5       | 5.27  | 0.53  | 8   | 0.7082 | 6.15                       | 0.69 | 6   | 0.2007 | 5.93    | 0.49 | 7   | 0.2551  | 5.79    | 0.36 | 6   | 0.1232  |
|                 | 1.00x IC <sub>50</sub> | 5.08        | 0.24 | 7   | 0.4793  | 3.46    | 0.54 | 0.1633 | 6       | 5.02  | 0.25  | 8   | 0.8662 | 6.87                       | 1.16 | 6   | 0.1591 | 5.04    | 0.29 | 6   | 0.0158  | 5.63    | 0.68 | 8   | 0.3730  |
|                 | 2.00x IC <sub>50</sub> | 4.32        | 0.41 | 7   | 0.2886  | 3.28    | 0.57 | 0.1605 | 4       | 5.64  | 0.61  | 8   | 0.4950 | 5.93                       | 1.80 | 5   | 0.5639 | 5.20    | 0.82 | 8   | 0.1800  | 5.68    | 0.59 | 8   | 0.2918  |
| Hemozoin        | 0.00x IC <sub>50</sub> | 67.64       | 5.31 | 7   | -       | 66.76   | 8.22 | -      | 4       | 66.77 | 8.22  | 4   | -      | 54.35                      | 3.01 | 6   | -      | 79.85   | 3.77 | 5   | -       | 68.07   | 4.95 | 8   | -       |
|                 | 0.10x IC <sub>50</sub> | 44.88       | 3.29 | 7   | 0.0034  | 65.63   | 4.22 | 0.8957 | 6       | 69.28 | 5.70  | 4   | 0.8102 | 50.65                      | 5.93 | 6   | 0.5898 | 58.37   | 4.48 | 6   | 0.0059  | 69.65   | 8.04 | 7   | 0.8660  |
|                 | 0.25x IC <sub>50</sub> | 30.59       | 3.34 | 6   | 0.0001  | 72.72   | 3.79 | 0.4803 | 6       | 71.38 | 11.47 | 4   | 0.7547 | 50.12                      | 7.07 | 6   | 0.5941 | 68.30   | 3.31 | 7   | 0.0454  | 70.09   | 8.84 | 6   | 0.8348  |
|                 | 0.50x IC <sub>50</sub> | 29.63       | 4.07 | 7   | 0.0001  | 75.56   | 5.49 | 0.3795 | 6       | 70.76 | 5.52  | 8   | 0.6893 | 49.93                      | 3.56 | 6   | 0.3654 | 54.28   | 5.57 | 7   | 0.0026  | 59.25   | 6.39 | 6   | 0.2888  |
|                 | 1.00x IC <sub>50</sub> | 29.70       | 3.65 | 7   | <0.0001 | 57.79   | 7.44 | 0.4519 | 6       | 61.99 | 3.77  | 8   | 0.5521 | 33.15                      | 2.94 | 6   | 0.0005 | 46.02   | 2.85 | 6   | <0.0001 | 47.60   | 3.25 | 8   | 0.0038  |
|                 | 2.00x IC <sub>50</sub> | 26.82       | 3.59 | 7   | <0.0001 | 41.32   | 4.97 | 0.0274 | 5       | 67.00 | 4.28  | 8   | 0.9784 | 28.55                      | 2.34 | 5   | 0.0001 | 32.92   | 3.31 | 8   | <0.0001 | 30.47   | 3.46 | 8   | <0.0001 |
| Total heme iron | 0.00x IC <sub>50</sub> | 74.21       | 5.30 | 7   | -       | 73.76   | 9.05 | -      | 4       | 73.76 | 9.05  | 4   | -      | 63.48                      | 3.59 | 6   | -      | 89.10   | 4.39 | 5   | -       | 74.40   | 5.06 | 8   | -       |
|                 | 0.10x IC <sub>50</sub> | 55.15       | 5.53 | 8   | 0.0282  | 70.69   | 4.57 | 0.7457 | 6       | 75.61 | 5.86  | 4   | 0.8699 | 58.64                      | 6.39 | 6   | 0.5234 | 66.56   | 4.96 | 6   | 0.0088  | 76.96   | 8.06 | 7   | 0.7869  |
|                 | 0.25x IC <sub>50</sub> | 36.48       | 3.41 | 6   | 0.0001  | 80.45   | 3.38 | 0.4442 | 6       | 78.89 | 12.83 | 4   | 0.7551 | 57.73                      | 7.39 | 6   | 0.4993 | 80.19   | 3.39 | 7   | 0.1333  | 78.09   | 8.89 | 6   | 0.7083  |
|                 | 0.50x IC <sub>50</sub> | 35.18       | 3.90 | 7   | <0.0001 | 83.48   | 5.68 | 0.3633 | 6       | 78.54 | 6.41  | 8   | 0.6757 | 59.67                      | 3.63 | 6   | 0.4725 | 62.84   | 6.25 | 7   | 0.0103  | 66.92   | 6.60 | 6   | 0.3772  |
|                 | 1.00x IC <sub>50</sub> | 36.07       | 3.86 | 7   | <0.0001 | 63.36   | 8.10 | 0.4257 | 6       | 69.81 | 3.80  | 8   | 0.6395 | 43.11                      | 3.46 | 6   | 0.0022 | 53.45   | 3.31 | 6   | <0.0001 | 56.20   | 3.59 | 8   | 0.0109  |
|                 | 2.00x IC <sub>50</sub> | 33.78       | 4.04 | 7   | <0.0001 | 50.14   | 7.96 | 0.0904 | 5       | 75.60 | 4.87  | 8   | 0.8472 | 37.19                      | 2.72 | 5   | 0.0003 | 40.54   | 4.17 | 8   | <0.0001 | 38.55   | 3.48 | 8   | <0.0001 |

Hemoglobin, free heme, hemozoin and total heme iron content per cell at different exposure levels to different drugs are expressed in fg/cell. The IC<sub>50</sub> of Dd2-B2 and PfMDR1<sup>seIV290F</sup> to GNF-Pf-5660 is 23.7 nM and 3750 nM, respectively. The IC<sub>50</sub> of Dd2-B2 and PfMDR1<sup>seIV290F</sup> to MQ is 24.2 nM and 8.5 nM, respectively. The IC<sub>50</sub> of Dd2-B2 and PfMDR1<sup>seIV290F</sup> to LMF is 3.8 nM and 1.0 nM, respectively. *P* values were calculated by a two-tailed *t*-test. MQ: mefloquine; LMF: lumefantrine; SEM: standard error of the mean.

**Supplementary Table 16.** Western Blot data.

|                                    |         | 4-day Peters test     |       |   |                |
|------------------------------------|---------|-----------------------|-------|---|----------------|
|                                    |         | mean IC <sub>50</sub> | SEM   | n | <i>P</i> value |
| PfMDR1 <sup>wild-type Dd2-B2</sup> | control | 1.000                 | 0.000 | 6 | -              |
|                                    | HHQ     | 0.679                 | 0.033 | 4 | 0.00034        |
|                                    | WR      | 1.223                 | 0.089 | 3 | 0.33076        |
|                                    | MQ      | 0.936                 | 0.201 | 4 | >0.9999        |
|                                    | LMF     | 0.907                 | 0.078 | 4 | >0.9999        |
|                                    | CQ      | 1.144                 | 0.383 | 4 | >0.9999        |
| PfMDR1 <sup>seIY290F</sup>         | control | 1.000                 | 0.000 | 4 | -              |
|                                    | HHQ     | 1.106                 | 0.194 | 4 | 0.6542         |

*P* values were calculated by a Welch's corrected t-test adjusted for multiple comparisons with the Bonferroni-Dunn method.

HHQ: hexahydroquinoline GNF-Pf-5660; WR: WR99210; MQ: mefloquine; LMF: lumefantrin; SEM: standard error of the mean.

**Supplementary Table 17.** Parasite lines generated in this study.

| Parasite line | Alternative name                | Origin               | <i>pfmdr1</i><br>copy number | PfMDR1 mutation<br>(allele balance) |
|---------------|---------------------------------|----------------------|------------------------------|-------------------------------------|
| 5668-3C4D2    | selected F1072L + CNV in Dd2-B2 | GNF-Pf-5668-selected | 4                            | F1072L (69%)                        |
| F1072L edited | PfMDR1 <sup>edF1072L</sup>      | CRISPR/Cas9-edited   | 2                            | F1072L (100%)                       |
| 5640-2C4C3    | -                               | GNF-Pf-5640-selected | 2                            | S1075I (100%)                       |
| S1075I edited | PfMDR1 <sup>edS1075I</sup>      | CRISPR/Cas9-edited   | 2                            | S1075I (100%)                       |
| 5640-3H9C7    | -                               | GNF-Pf-5640-selected | 2                            | Y290F (50%)                         |
| 5660-2B6H1    | PfMDR1 <sup>selY290F</sup>      | GNF-Pf-5660-selected | 2                            | Y290F (100%)                        |

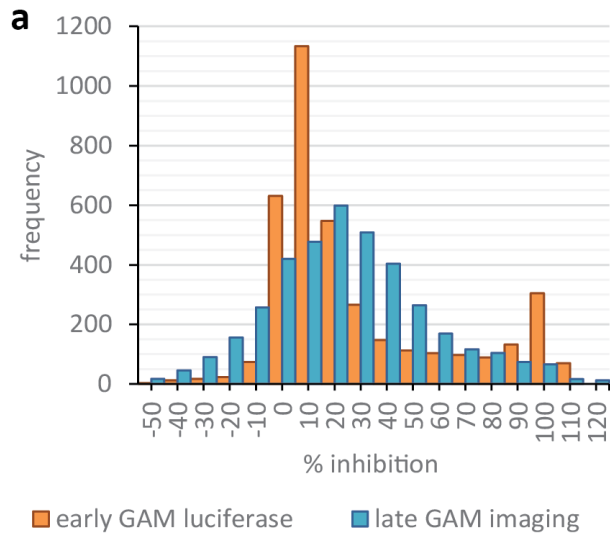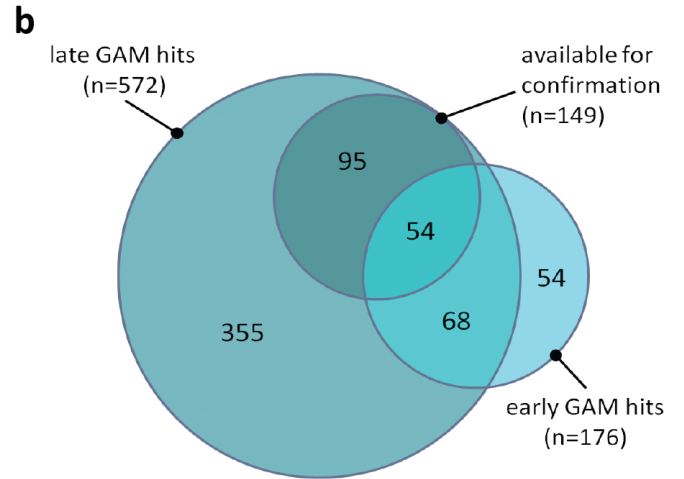

**Supplementary Figure 1.** Inhibitory activity distribution in the two primary screening campaigns **(a)** and availability of samples for dose-response confirmation testing in relationship to hit activity profile **(b)**.

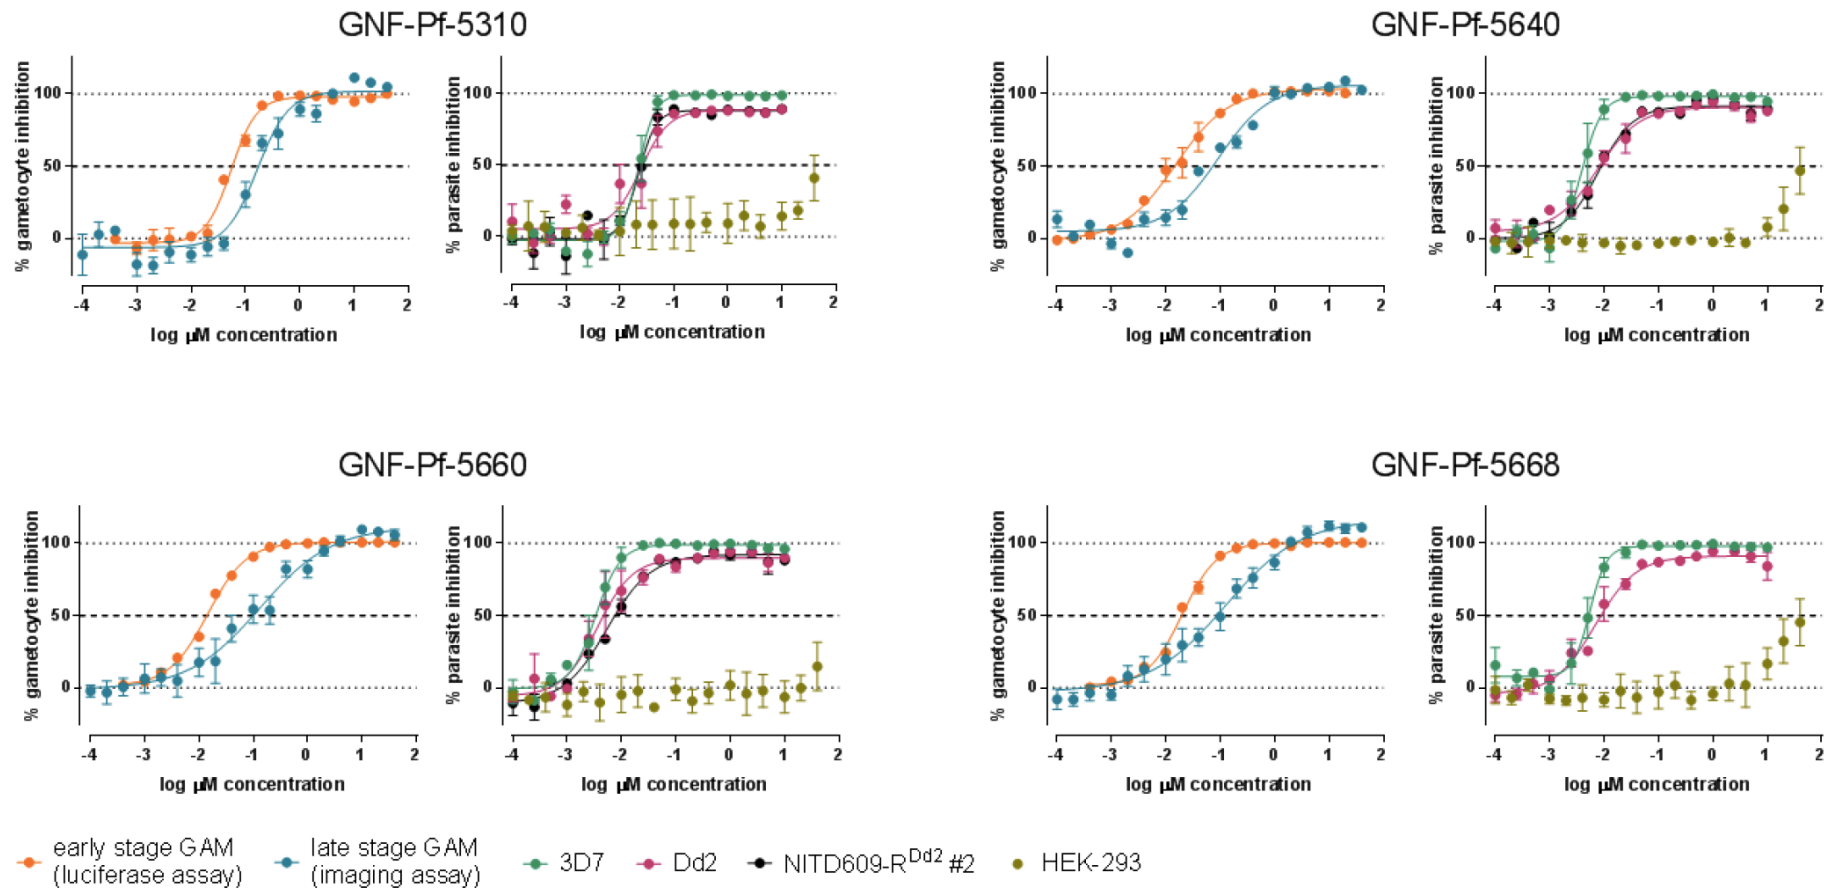

**Supplementary Figure 2.** Gametocytocidal, asexual and cytotoxic dose-responses of the selected compounds. Error bars indicate standard error of the mean.



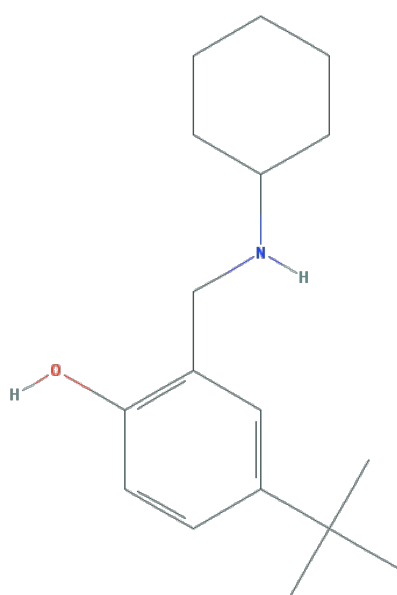

**Supplementary Figure 3.** Structure of GNF-Pf-5310.

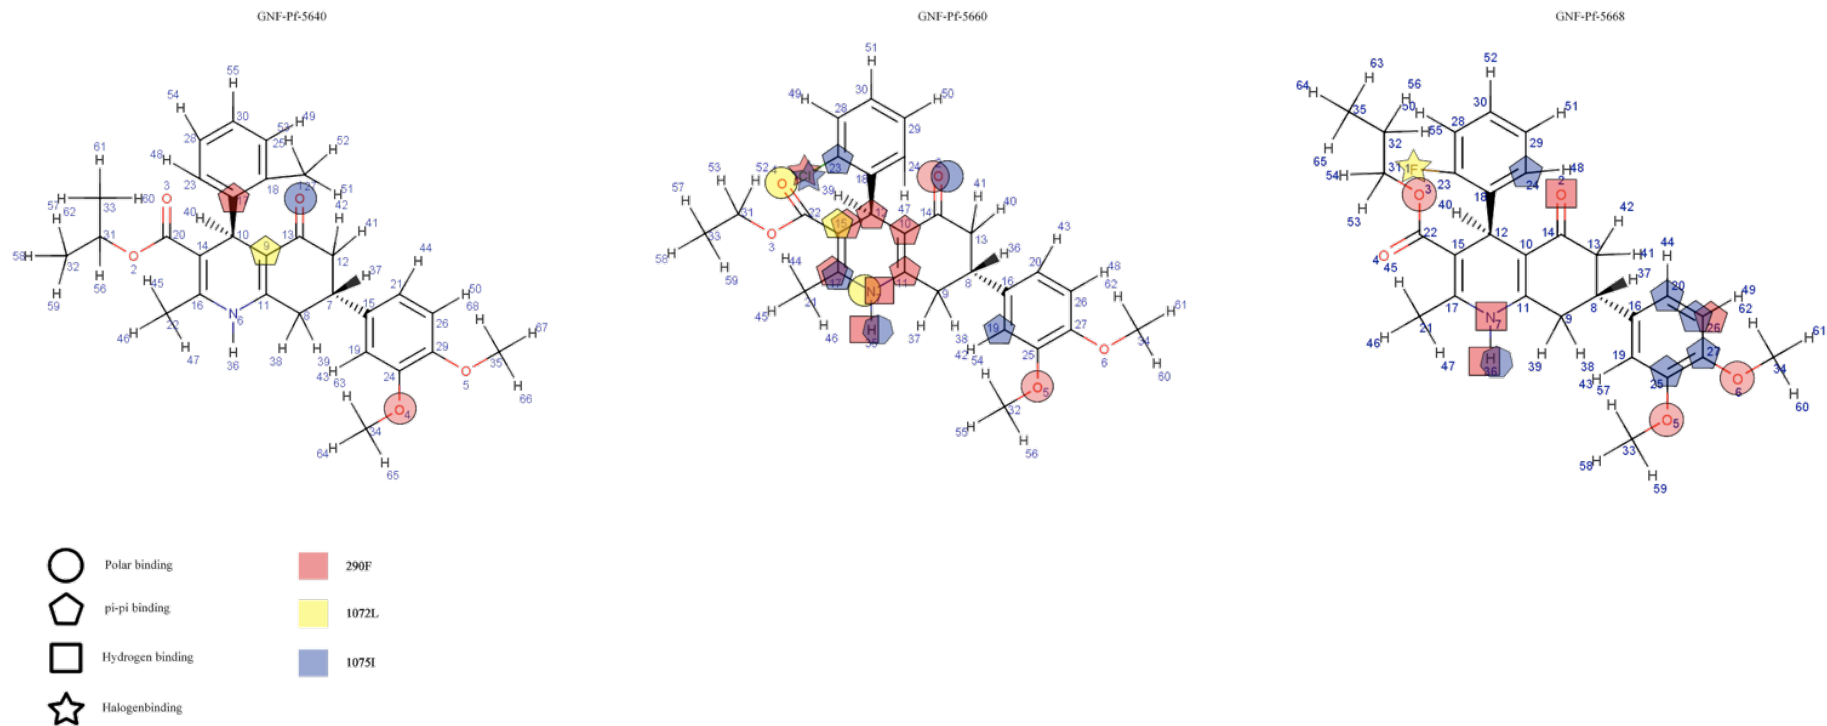

**Supplementary Figure 4.** Moieties of HHQs that interact with mutant PfMDR1. Numbering is consistent with Supplementary Table 8.

Supplementary Figure 5a. Western blots experiments 1–3.

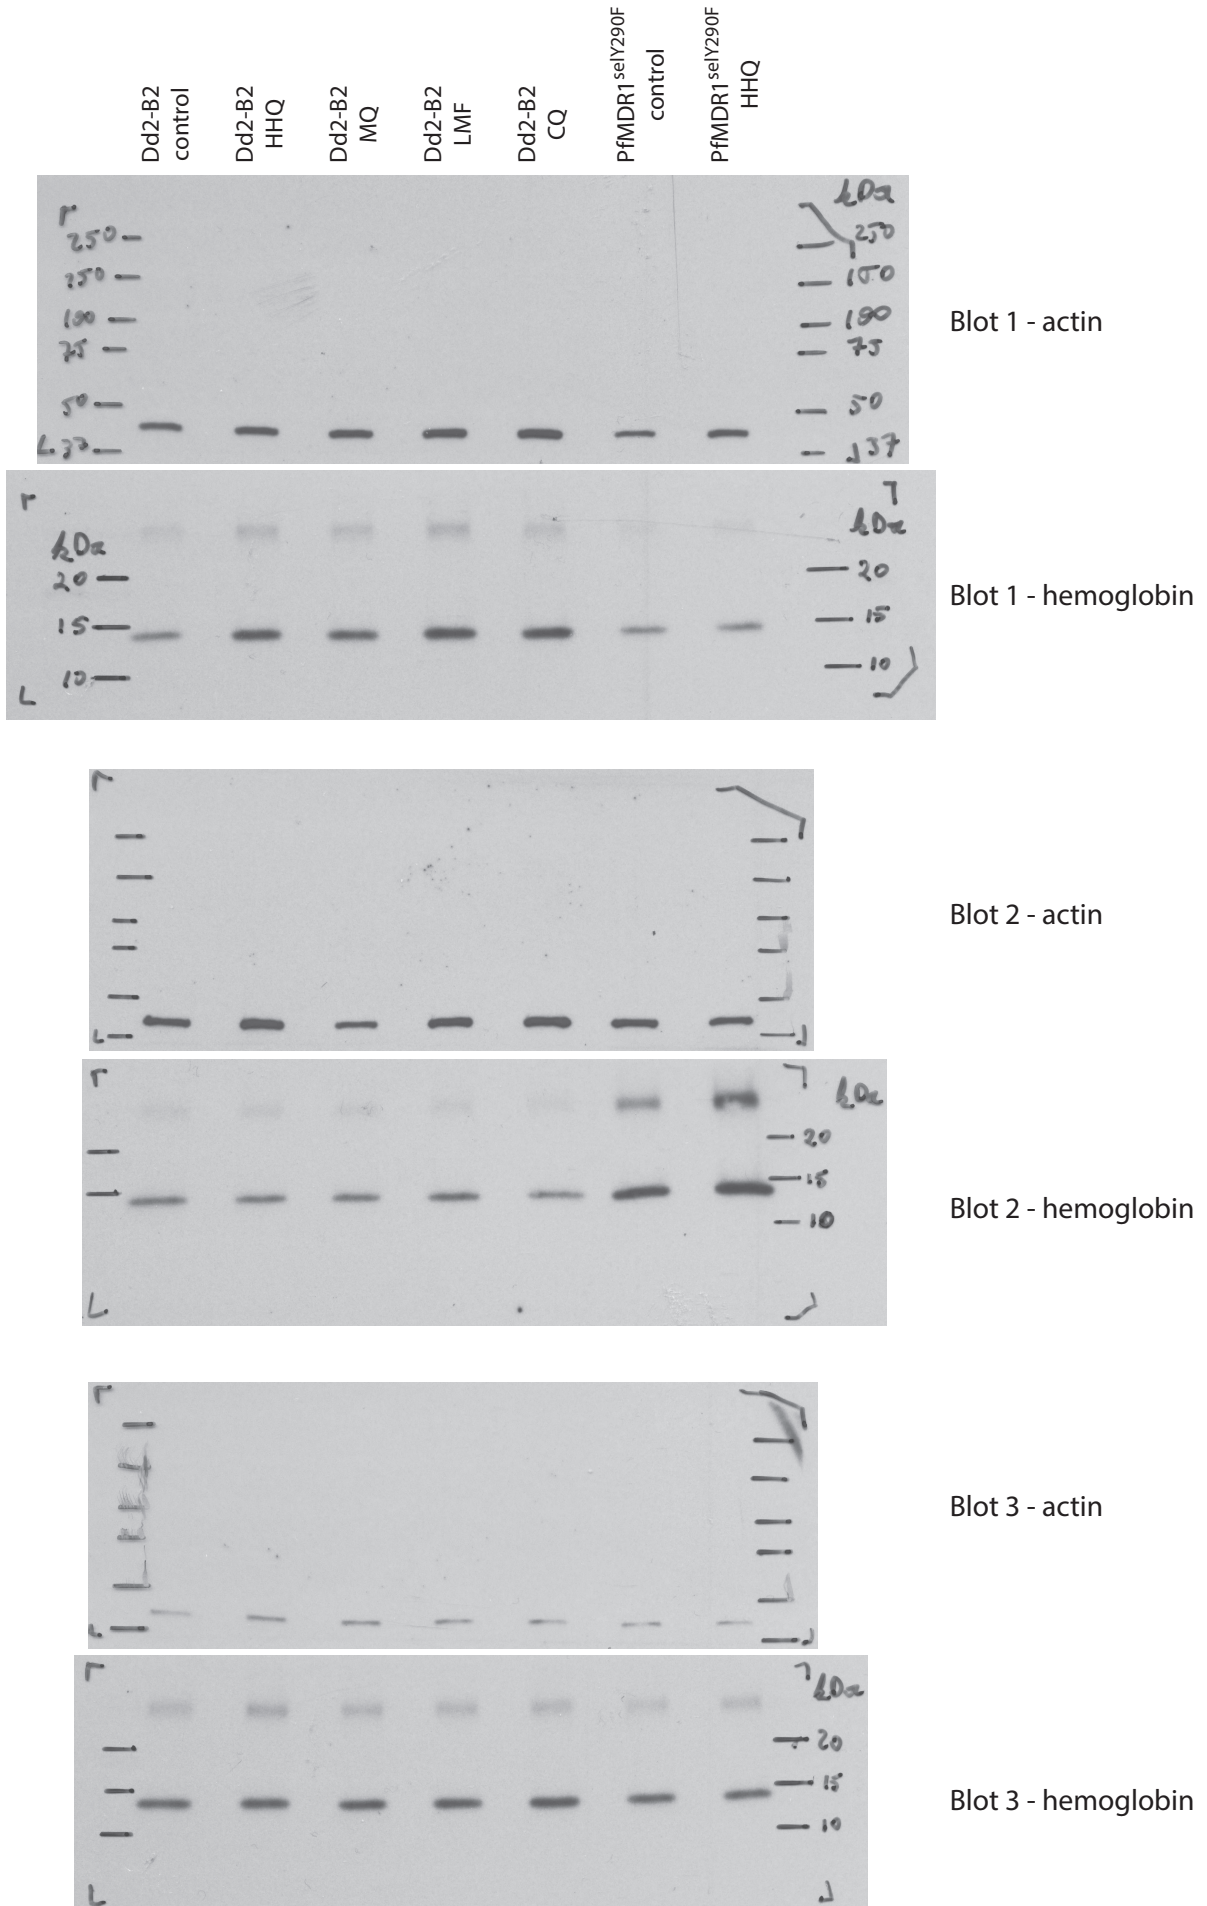

**Supplementary Figure 5b. Western blots experiments 4-6.**

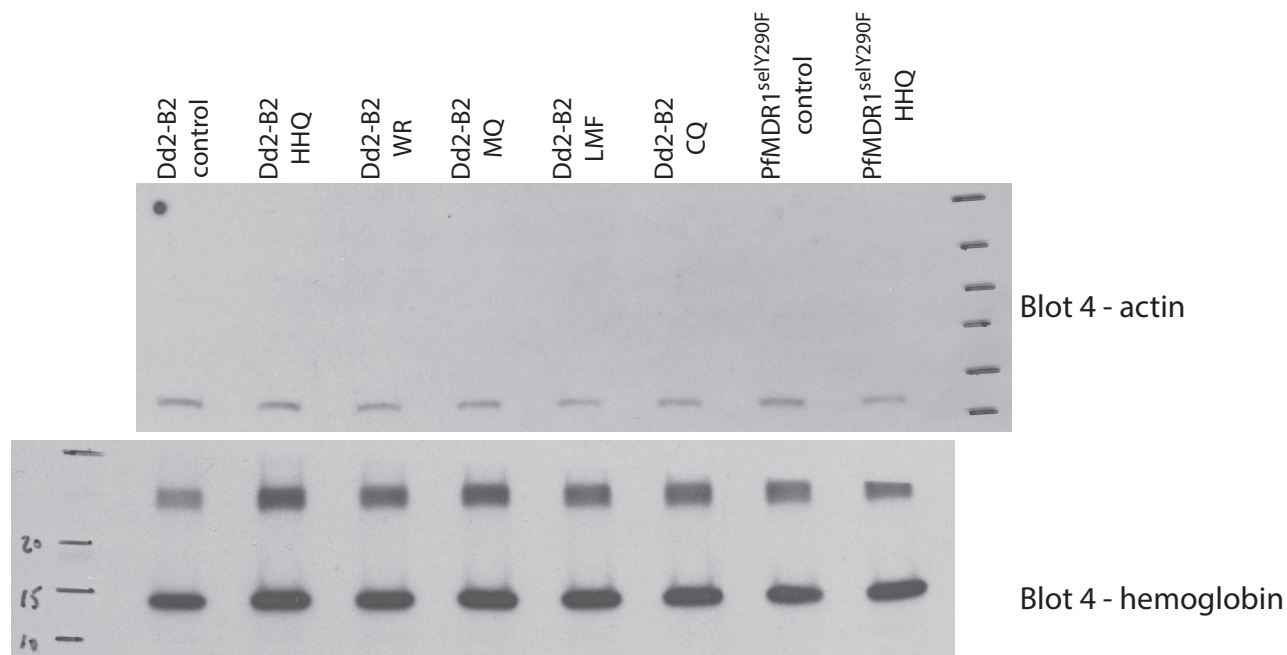

\*: lane contains samples unrelated to the quantification experiment

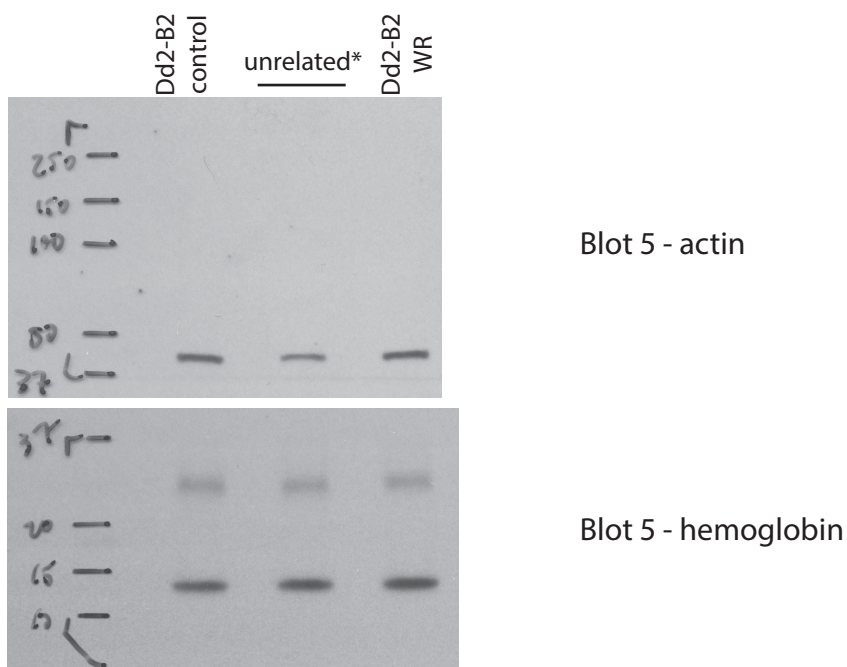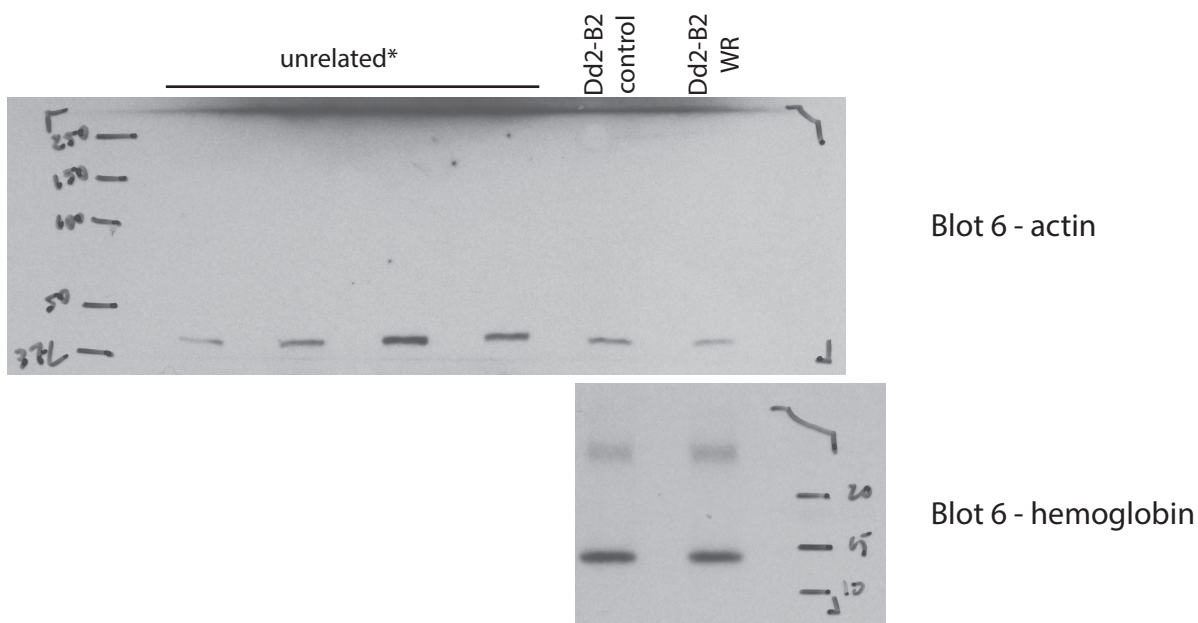

Supplement: NIHMS919566-supplement-1.pdf [file NIHMS919566-supplement-1.pdf]
